1       **Full Title: EVALUATION OF THE EFFECT OF MESENCHYMAL STEM CELLS**  
2       **ON CHEMOTHERAPY RESPONSE FOR NEUROBLASTOMA TREATMENT IN AN**  
3       **EXPERIMENTAL ANIMAL MODEL**

4       **Short Title: EFFECT OF MESENCHYMAL STEM CELLS ON CHEMOTHERAPY**  
5       **RESPONSE FOR NEUROBLASTOMA**

6       Safiye AKTAS, Prof. Dr. Dokuz Eylül University Institute of Oncology Department of Basic  
7       Oncology, Izmir, TURKEY [safiye.aktas@deu.edu.tr](mailto:safiye.aktas@deu.edu.tr) 0000-0002-7658-5565

8       Yuksel OLGUN, Assoc. Prof. Dr. Dokuz Eylül University, Faculty of Medicine, Department  
9       of Otorhinolaryngology, Izmir TURKEY [yuksel.olgun@deu.edu.tr](mailto:yuksel.olgun@deu.edu.tr) 0000-0003-1769-4224

10       Hande EVİN, PhD. Dokuz Eylül University Health Services Vocational School, Department  
11       of Medical Services and Techniques Audiometry Program, Izmir, TURKEY  
12       [hande.evin@deu.edu.tr](mailto:hande.evin@deu.edu.tr) 0000-0001-6614-2341

13       Ayse Pinar ERCETIN, PhD. Dokuz Eylül University Institute of Health Sciences,  
14       Department of Basic Oncology, Izmir, TURKEY [pinar.ercetin@deu.edu.tr](mailto:pinar.ercetin@deu.edu.tr) 0000-0003-4997-  
15       7333

16       Tekincan Cagri AKTAS, MD, sPhD, Dokuz Eylül University Institute of Oncology  
17       Department of Basic Oncology, Izmir, TURKEY [tekincanaktas@yahoo.com](mailto:tekincanaktas@yahoo.com) 0000-0002-4960-  
18       5225

19       Osman YILMAZ, Prof Dr. Department of Laboratory of Animal Science, Dokuz Eylül  
20       University School of Medicine, Izmir, Turkey [osman.yilmaz@deu.edu.tr](mailto:osman.yilmaz@deu.edu.tr) 0000-0001-7817-  
21       7576

22       Gunay KIRKIM, Prof. Dr. Dokuz Eylül University Health Services Vocational School,  
23       Department of Medical Services and Techniques Audiometry Program, Izmir, TURKEY  
24       [gunay.kirkim@deu.edu.tr](mailto:gunay.kirkim@deu.edu.tr) 0000-0003-4170-5317

25 Nur OLGUN, Prof. Dr. Dokuz Eylül University Institute of Oncology Department of  
26 Clinical Oncology, Izmir, TURKEY [nur.olgun@deu.edu.tr](mailto:nur.olgun@deu.edu.tr) 0000-0001-9591-0207

## 27 **ABSTRACT**

28 High-dose cisplatin (CDDP) causes dose-limiting side effects in neuroblastoma (NB) treatment.  
29 Mesenchymal stem cells (MSC) are a current research area in cellular treatments due to  
30 multipotential characteristics. The aim of this study is to assess the interaction of MSC with  
31 CDDP in an athymic nude mouse NB model. Athymic male nude mice (n=28) were injected  
32 subcutaneously with C1300 NB cell line. After tumor growth to 1 cm diameter in 7-10 days,  
33 mice were randomly assigned to one of 4 experimental groups of control, CDDP treatment,  
34 MSC treatment and CDDP+MSC treatment with 7 mice in each group. Animals had basal  
35 auditory tests performed and had physiological serum or CDDP (20 mg/kg) injected into the  
36 peritoneum and were intravenously injected with  $1 \times 10^5$  MSC once. Seven days later, hearing  
37 tests were performed again and the animals were sacrificed. Tumor tissue was assessed in terms  
38 of necrosis, apoptosis and viability. Apoptosis was evaluated with annexin V+PI flow  
39 cytometry analysis and TUNEL. Additionally, the MSC rate within the tumor was assessed  
40 with flow cytometry for triple CD34+ CD44+ and CD117- expression. Additionally, liver,  
41 kidney, brain and cochlear tissue were analyzed with light microscopy in terms of systemic side  
42 effect profile. Expression of the cochlear cell proteins of calretinin, math-1 and myosin2A were  
43 immunohistochemically assessed in ear sections. Statistical analysis used the nonparametric  
44 Kruskal Wallis and Mann Whitney U tests with  $p < 0.05$  significance. Tumor tissues were found  
45 to have statistically significantly higher levels of necrosis in the CDDP group and CDDP+MSC  
46 group compared to the control and MSC groups ( $p=0.001$ ,  $p=0.006$ ). The CDDP+MSC group  
47 had lower tumor necrosis rates than the CDDP group but this was not observed to have  
48 statistical significance ( $p=0.05$ ). MSC did not change the tumor dimensions in the CDDP group  
49 ( $p=0.557$ ). The groups administered MSC had higher triple CD34+ CD44+ and CD117-

50 expression within tumor tissue compared to the control and CDDP groups. In the inner ear, the  
51 expression of cochlear cell proteins calretinin, math-1 and myosin2A were identified to be  
52 highest in the groups administered MSC. Auditory tests observed that the 15-decibel loss at 12,  
53 16, 20 and 32 kHz frequencies in both ears with CDDP was resolved with MSC administration.  
54 With this study, IV administration of MSC treatment was observed to prevent the hearing loss  
55 caused by CDDP without disrupting the antitumor effect of CDDP. Systemic MSC may be  
56 assessed for clinical use to reduce the side effects of CDDP.

57 **Key words:** neuroblastoma; mesenchymal stem cell; cisplatin

## 58 INTRODUCTION

59 Neuroblastoma (NB) is a noteworthy embryonal tumor with interesting heterogeneous  
60 biological behavior rooted in the neural crest of the sympathetic nervous system. In spite of  
61 intensive protocols and alternative treatment approaches in advanced stage disease, the two-  
62 year disease-free survival only reaches 30-40%. Cisplatin (CDDP) is used in the induction  
63 therapy cycle for NB in combination with anthracyclines, alkylating agents and topoisomerase  
64 II inhibitors [1]. Induction chemotherapy continues with a multimodal approach involving  
65 surgical resection, myeloablative treatment and autologous stem cell transplant and radiation  
66 therapy [2]. In recent years, immunotherapy, the ALK inhibitor crizotinib in patients with ALK  
67 mutations and targeted treatments based on genomic analysis of tumor samples have been  
68 trialed.

69 In NB treatment areas, side effects of hearing loss (62%), primary hypothyroidism  
70 (24%), ovarian failure (41% in women), musculoskeletal system anomalies (19%) and  
71 pulmonary anomalies (19%) are observed [5]. CDDP is used for human solid tumors in many  
72 cancer types like ovarian, prostate, cervical, head-neck, lung and bladder cancer and in NB.  
73 However, considering ototoxicity especially, nephrotoxicity, neurotoxicity and bone marrow

74 toxicity occurring with use of high-dose CDDP, dose limitation represents a significant problem  
75 for the therapeutic profile and benefit of the drug [6,7]. Apart from ototoxicity, all other side  
76 effects may be resolved with support treatment methods. There is research into many protective  
77 agents, both chemical agents and containing natural extracts, for use against CDDP ototoxicity.  
78 The current literature includes a variety of dose- and/or time-dependent efficacy for many  
79 agents including Korean red ginseng [8], dexamethasone [9], resveratrol [10], silymarin [11],  
80 metformin [12], selenium [13] and others. In addition to preventing hearing loss occurring  
81 linked to CDDP and disrupting quality of life in a serious sense, studies about regaining this  
82 faculty have gained much importance.

83         Mesenchymal stem cells (MSC) have multipotent capability and have become a topic  
84 of current research as a cell transplant-based promising therapeutic approach due to their ability  
85 to differentiate into mesenchymal cell series like osteoblast, adipocyte and chondroblast.  
86 However, there are few studies interrogating the interaction of MSC with cancer treatment and  
87 preventive properties for chemotherapy side effects. MSC has natural tropism in tumor tissue.  
88 MSC transports antitumor molecules like cytokines and interferon into the tumor  
89 microenvironment and are considered as cellular treatment agents [14]. MSC were shown to  
90 mediate transformation in neurogenic differentiation of cochlear auditory hair cells in vitro [15].  
91 Our previous studies attempted to administer MSC and CDDP to an in vitro coculture model of  
92 cochlear cells. It was concluded that MSC supported renewal of cells after ototoxicity was  
93 induced in HEI-OC1 cochlear cells by CDDP. The study induced ototoxicity with 100 uM  
94 CDDP and administered MSC with 40% difference identified in viability of cochlear cells after  
95 incubation. It was identified that MSC reduced the cochlear cell injury caused by CDDP [16].  
96 In light of these findings, our hypothesis in this study is that systemic MSC administered with  
97 CDDP for NB will reduce the ototoxicity side effect and not change the anticancer efficacy.

98           The aim of the study is to assess whether systemic MSC administration in an NB  
99 experimental animal model disrupts the antitumoral effect of CDDP used as chemotherapy  
100 agent and to reveal the side effect profile, especially in terms of ototoxicity.

## 101 **MATERIALS AND METHODS**

102 This study received research ethics committee approval from Dokuz Eylül University  
103 Multidisciplinary Animal Laboratory Animal Experiments Ethics Committee at a meeting  
104 dated 12 September 2017 with protocol number 38/2017.

### 105 **Cell Culture**

106 *C1300 cell line*: This is a mouse-derived NB cell line. As seen in our previous studies, it is a  
107 cell line inducing tumors in athymic nude mice [17]. It was cultured in DMEM media (1% L-  
108 glutamine and 1% penicillin/streptomycin) containing 10% fetal bovine serum at 37 °C in a 5%  
109 CO<sub>2</sub> incubator. When cells reached nearly 90% confluent levels, they were removed from the  
110 flask surface with trypsin-EDTA solution and placed in a 96-well plate with 6 wells/group and  
111 5000 cells per well. Cells were left for 24 hours to adhere to the wells and then upper phases  
112 were removed with a pipette taking care not to lift the cells. CDDP with different doses was  
113 administered (10, 25, 50, 100 and 250 uM). The plate was incubated for 24 hours at 37 °C in a  
114 5% CO<sub>2</sub> incubator. At the end of the incubation duration, cell viability was examined with  
115 MTT. LD<sub>50</sub> doses were determined [18] (Fig 1).

116

117           Figure 1: In vitro cytotoxic effects of Cisplatin on C1300 neuroblastoma cells with/ without  
118 MSCs.

119 *C57BL/6 mouse mesenchymal stem cells line*: This is a mesenchymal stem cell line derived  
120 from mouse bone marrow (Cyagen, MUBMX-01201). It has osteogenic, chondrogenic and  
121 adipogenic differentiation features. It was developed from C57BL/6 mouse tibia. It is CD34

122 positive, CD44 positive and CD117 negative. It was purchased at ninth passage. It was cultured  
123 in a cell-specific differentiation preventing medium at 37 °C in 5% CO<sub>2</sub> humidified incubator  
124 (OriCell™ Mouse Mesenchymal Stem Cell Growth Medium (Cat. No. MUXMX-90011)).  
125 Medium was changed once every two days to reduce MSC markers and it was dissociated and  
126 passaged with trypsin-EDTA when 75% confluent. Freezing was performed in a protein-free  
127 cryopreservation freezing medium.

128 *Coculture formation:* To assess the effect of MSC cells on the cytotoxic effect of CDDP for  
129 NB cells, C1300 cells were proliferated in a 96-well plate. With 6 wells for every set, the control  
130 group only had medium applied, the CDDP group had LD50, the only MSC group had 5000  
131 MSC, the CDDP and MSC group had CDDP LD50 + 5000 MSC applied for 24 hours. Cell  
132 viability was tested with MTT. Under the same conditions, apoptosis cell death was assessed  
133 with annexin V+PI flow cytometry in 6 wells.

#### 134 **Cell Viability Test**

135 Cell proliferation testing with MTT used 96-well plates containing cells, with only  
136 medium placed in three empty wells used blind. With cells of 100 µl/well in each well, 10  
137 µl/well MTT cell proliferation reactive was added (1:10 dilution). Cells were left at 37 °C 5%  
138 CO<sub>2</sub> in an incubator for 4 hours. After mixing on a plate mixer for 1 min, they were read with  
139 an ELISA reader at 420-480 nm. The reference wavelength was chosen as more than 600 nm  
140 (630 nm). Mean absorbance in the control group was accepted as 100% viability, while this was  
141 compared with other cell viability levels to obtain percentages.

#### 142 **Induction of Xenograft Neuroblastoma Tumor Model**

143 In our study, male athymic nude mice (nude CD1 mice) aged 8 weeks with mean weight  
144 20 g were placed in a special room in Dokuz Eylül University Faculty of Medicine  
145 Experimental Animals Research Laboratory (DEÜTFDHAL). Ventilation used a hepafilter, and

146 mice were housed in special cages at room temperature ( $20 \pm 2$  °C) with 12-hour light/dark  
147 environment. They were fed with sterile pellet mouse feed and given access to sterile water ad  
148 libitum. Before beginning the study, mice were observed in this environment for one week to  
149 ensure they adapted. Study design and time schedule is given in fig 2.

150 Figure 2: Study design and time shedule.

151 Mice had C1300 NB cells with  $1 \times 10^6$  cell/0.3 ml in incomplete DMEM injected via the  
152 subcutaneous route on the left side of the back to ensure tumor development. When the induced  
153 tumors reached 150 mm<sup>3</sup> (nearly 10 days), mice were randomized into groups with n=7 in each  
154 four group (Control SF, MSC, CDDP, MSC+CDDP). Number of mice per group (sample size)  
155 was selected prioritizing 3R rule and using our previous studies in order to achieve statistical  
156 power greater than 80% at 0.05 alpha by ClinCalc program sample size calculator. Independent  
157 study groups with dichotomous primary end point for hearing loss was taken for anticipated  
158 incidence 15% in control group and 85% in CDDP group. If no tumor formation was observed  
159 within 15 days of this administration, the same amount of C1300 cells were injected again to  
160 assess tumor formation. During the study, the plan was that animals with development of sepsis,  
161 with veterinary agreement and with clear reduction in response to stimuli, and with loss of more  
162 than 15% weight would be excluded from the study. There was no need to exclude any animals  
163 from the study. Mice were weighed routinely once per day in a class 2 cabinet to monitor weight  
164 loss. The researchers performed all studies in sterile conditions wearing gloves, glasses and  
165 special aprons. Tumor size was monitored each day with calipers. One week after CDDP (20  
166 mg/kg) and MSC ( $10^6$  cell/mouse) administration, mice were sacrificed (fig 3). After  
167 applications, remaining medication solutions were appropriately destroyed. Before sacrificing  
168 mice, isoflurane inhalation anesthesia was administered. The abdomen was opened and nearly  
169 all blood was removed from the vena cava inferior and the cardiac main veins were cut. After  
170 death, organs and tissues of mice were dissected. After dissecting the residual tumor bed, part

171 of it was stored in a cell culture medium, while part of it was placed in formoline solution for  
172 light microscope analyses.

173

174 Figure 3: Subcutaneous Tumor appearances of nude mice comparing first and seventh days  
175 in CDDP and MSC groups.

176

177 Chemicals:

178 *Cisplatin (KOÇAK FARMA)*: Liquid form was administered at dose of 20 mg/kg under  
179 in vivo conditions to mice with cancer induced.

#### 180 **Brainstem Auditory Evoked Potential Test:**

181 Nude mice were administered anesthesia with 40 mg/kg ketamine and 10 mg/kg  
182 xylazine intraperitoneal and basal and 7<sup>th</sup> day evoked brainstem responses were tested with the  
183 ABR test (Fig 4). All nude mice first had otoscopic examination performed before hearing  
184 measurements and nude mice with normal otoscopic exam and basal ABR test hearing threshold  
185 of 25 dB SPL and below were included in the research. Tests were completed under appropriate  
186 aseptic conditions and in sterile cabinets. An Intelligent Hearing Systems (IHS, Miami, FL)  
187 device Smart-EP 10 version was used. Subdermal needle electrodes were inserted into the  
188 vertex, ipsilateral and contralateral retroauricular areas. A platinum-iridium needle electrode  
189 was used as recording electrode. The ABR test used 4, 8, 12, 16, 20 and 32 kHz in the Blackman  
190 envelope with tone burst stimuli with fluctuation time 1000 ms [19, 20]. The lowest intensity  
191 level obtained with the III wave was accepted as the hearing threshold of the nude mouse at that  
192 frequency.

193 Figure 4: ABR records of right and left ear.



## 194 **Light Microscopic Assessment**

195 Half of tumor tissue, kidney, lung, brain, cerebellum, heart, spleen and liver were left in formol  
196 for 24 hours after dissection. Sections were chosen with macroscopic investigations and cut to  
197 cassettes. The region including the outer, central and inner ear involving bone tissue was  
198 dissected from the skull by an ear-nose-throat expert. After fixation in formol for 24 hours, it  
199 was left in 5% glacial acetic acid for 3 days for decalcification. It was cut in two from the broad  
200 surface and left in acid for one more day, washed with flowing water and cut to sections with 3  
201 mm thickness as cassettes. All cassettes underwent standard large tissue monitoring and  
202 paraffin blocking after being left in formol for 24 hours and then sections with 5-micrometer  
203 thickness were placed on slides and stained with hematoxylin eosin. These slides were  
204 examined histopathologically by a pathologist under a light microscope (Olympus B50). Tumor  
205 tissue was researched for morphology, angiogenesis, invasion, necrosis and live tissue  
206 proportions and organs were examined for morphological changes.

## 207 **Apoptosis Analysis with TUNEL on Paraffin Sections**

208 Sections obtained after routine paraffin blocking processes for half of tumor tissue and  
209 ear tissue sections were left overnight in a 60 °C incubator and then left in 2 x 30 min xylene  
210 after cooling. Sections were passed through 96%, 80%, 70% and 60% ethyl alcohol series for 2  
211 minutes each and washed with PBS for 5 min. Circumference of sections were drawn with a  
212 pen and left in Proteinase K solution at 1:500 dilution for 15 min at room temperature. After 3  
213 x 5 min washing with PBS solution, endogenous peroxide blockage was performed (3% H<sub>2</sub>O<sub>2</sub>)  
214 (5 min). After washing with PBS solution for 3 x 5 min, they were washed in equilibration  
215 buffer solution for 5 min at room temperature. For each section, 100 µl TdT solution was  
216 prepared (77 µl reaction buffer solution + 33 µl TdT) and dropped onto the sections. Sections  
217 with TdT had a plastic lamella placed on the slide and were left at 37 °C for 1 hour and then  
218 washed at room temperature for 10 min with prepared reaction stopping buffer solutions (1 ml

219 stop washing buffer + 34 ml distilled water). They were left with anti-digoxygenin conjugate  
220 for 30 min at room temperature. After washing with PBS solution for 3 x 5 min, DAB solution  
221 was dropped on the sections and they were left in an enclosed humid box for 5-10 min. After  
222 washing with PBS solution for 3 x 5 min, they were washed with distilled water and nucleus  
223 staining was performed with Mayer's hematoxylin checked with 1-5 min staining. After  
224 washing with distilled water, the sections were left in 80%, 96% and 100% ethyl alcohol for 1  
225 min each, then dried and purified with xylene 2 times for 5 min each. Closing medium was used  
226 and sections were covered with lamella. Assessment counted 1000 cells in 5 different areas of  
227 the tumor tissue and recorded the mean percentages. In the inner ear, all cells and positive cells  
228 were counted and % values were calculated.

#### 229 **Apoptosis Assessment with In Vitro Tests and Fresh Tumor Tissue Annexin V+PI**

230 Cells collected with a cell scraper during in vitro tests and created by mechanical  
231 degradation of half of the tumor tissue from the 28 animals when fresh were passed through a  
232 50-micrometer filter and stored at -80 °C in single cell suspension freezing medium. Half of the  
233 suspended cells were placed in 15 ml Falcon tubes, centrifuged at 1200 rpm for 5 min,  
234 supernatant removed and then resuspended with 1 x concentration 100 µl buffer prepared by  
235 dilution of the 10 x binding buffer given with the pellet kit and transferred to polystyrene 5 ml  
236 flow cytometry test tubes. In order to perform correct gating settings for the analysis, the same  
237 sample was placed in one tube without staining, while another tube had only 5 µl propidium  
238 iodide (PI), one tube had only 5 µl FTIC-Annexin V and one tube had PI with Annexin V added  
239 to 5 µl. These tubes were incubated for 15 min at room temperature in a dark environment. At  
240 the end of incubation, the tube had 400 µl binding buffer added and flow cytometry analysis  
241 was performed. After appropriate gating, those stained with only Annexin V were identified as  
242 early apoptotic, those stained with both annexin V and PI were late apoptotic and those with

243 only <<<< PI staining were identified as necrotic. The percentage data obtained were used for  
244 comparative calculations according to the initial cell counts.

#### 245 **Determination of Intratumoral Mesenchymal Stem Cell Counts**

246 The other half of the single cell suspension created by mechanically degrading half of  
247 the fresh tumor tissue after sacrifice in medium and passing through a 50-micrometer filter was  
248 used. CD34 (abcam PerCP Cy 5.5), CD44 positive (abcam APC), and CD117 negative (abcam  
249 PE) MSC markers were assessed with flow cytometric analysis. Flow cytometric analysis of  
250 MSC biomarkers was completed using monoclonal antibodies labeled with PerCP Cy 5.5, PE  
251 and APC after incubation at room temperature for 15 min in a dark environment and then  
252 washing with PBS. After centrifuging, unbound antibodies were removed and the sample was  
253 resuspended in 500 µl PBS and analyzed with a BD Accuri flow cytometry device. MSCs  
254 identified as CD34+ CD44+ CD117- were identified with appropriate gating.

#### 255 **Assessment of Mesenchymal Stem Cell Differentiation in the Inner Ear**

256 After fixation and decalcification, serial sections were cut from paraffin blocks with a  
257 microtome and sections with 5 micrometer thickness from the inner ear region were placed on  
258 positive-loaded slides. Unstained serial sections were investigated under the microscope and  
259 sections containing Corti organ and spiral ganglion were chosen and separated for  
260 immunohistochemical staining. To show the stimulating effect of MSC on cochlear cell  
261 differentiation preventing the ototoxic effect of CDDP on cochlear cells, specific markers for  
262 MSC and HEI-OC1 in the experimental groups were identified with immunocytochemical  
263 staining. MSC markers used CD34 (abcam), while HEI-OC1 biomarkers used myosin IIA  
264 (Bioss), Math-1 (Bioss), and calretinin (Bioss) staining. Immunohistochemical staining was  
265 performed with automatic staining in a Ventana Discover device. The device deparaffinizes  
266 sections and places them in water. Cells are made permeable for intracellular staining and then

267 blocking, incubation with 1/200 diluted primary antibodies, incubation with secondary  
268 antibodies and appropriate washing steps are performed. Then contrast staining with  
269 hematoxylin is performed, sections are dehydrated by treatment with xylol, closed with a  
270 lamella and evaluated with a light microscope. Calretinin is a marker of immature inner ear as  
271 expression begins in the inner ear from the 13<sup>th</sup> day of the embryonic period and continues until  
272 the adult period. Math-1 is expressed by developing hair cells and is not expressed by non-  
273 sensorial cells. Math-1 shows positive expression in immature and hair cells [21-23].

#### 274 **Statistical Analysis**

275 SPSS 22.0 software was used to compare means for viability, apoptosis and differentiation  
276 markers in every experimental group (non-parametric Mann Whitney U test and Kruskal Wallis  
277 test) including data from 7 animals in every group. Comparison of categoric variables was  
278 performed with the chi-square Fisher exact test. P<0.05 was accepted as statistically significant.

### 279 **RESULTS**

#### 280 **In Vitro Results**

281 The viability percentages of C1300 cells after 24 hours with 25 uM, 50 uM, 100 uM, 250 uM  
282 and 500 uM CDDP treatment were 88.1%, 68.7%, 51.3%, 43.7%, and 32.5%, respectively;  
283 while after 48 hours with 25 uM, 50 uM, 100 uM, 250 uM and 500 uM CDDP treatment  
284 viability was 42.9%, 34.2%, 22.6%, 16.2% and 11.2%, respectively. The viability percentages  
285 for C1300 cells after 72 hours of 25 uM, 50 uM, 100 uM, 250 uM and 500 uM CDDP treatment  
286 were 92.3%, 91.3%, 77.8%, 38.5% and 19.2%, respectively. Accordingly, for in vitro tumor  
287 modelling, 100uM doses of CDDP and 24 hours of incubation were selected. After MSCs co-  
288 cultured with C1300 cells were treated with 25 uM, 50 uM, 100 uM, 250 uM and 500 uM of  
289 CDDP for 24 hours, cell viability percentages were 61%, 70%, 48.8%, 31.1% and 17.5%,

290 respectively. When C1300 cells and MSCs were cocultured and treated with CDDP, the  
291 selected time and dose did not change.

### 292 **Xenograft Neuroblastoma Tumor Model Results**

293 Mice with mean tumor diameter 1.2 mm had medication, cell and physiological saline  
294 administered. Difference in tumor diameters from initial values over 7 days were noted in terms  
295 of tumor progression. The difference in mean tumor diameter was 4.85 mm in the control group,  
296 2.14 mm in the MSC group, -3.14 mm in the CDDP group and -2.43 mm in the CDDP+MSC  
297 group. While the tumor diameters increased in the control and MSC groups, the tumor diameters  
298 reduced in the CDDP and CDDP+MSC groups. Both CDDP and CDDP+MSC administrations  
299 reduced tumor diameter compared to the control group ( $p=0.01$ ). Administration of MSC alone  
300 was not identified to cause a statistical difference in tumor diameter difference compared with  
301 the control group ( $p=0.128$ ). Administration of MSC did not statistically significantly change  
302 the reduction in tumor size compared to the CDDP group ( $p=0.805$ ).

### 303 **Apoptosis Assessment with Annexin V+PI in Fresh Tumor Tissue**

304 Single cell suspension was prepared from tumor tissue on the 7<sup>th</sup> day and analyzed with flow  
305 cytometry. When the control group is compared with the CDDP group, higher early apoptotic,  
306 late apoptotic, total apoptotic and necrotic cell percentages were identified in the CDDP group  
307 ( $p=0.017$ ,  $0.038$ ,  $0.026$ ,  $0.001$ ). Again, when the control group is compared with the  
308 CDDP+MSC group, cell measurements for all four parameters were found to be higher in the  
309 CDDP+MSC group ( $p=0.001$ ). Both apoptotic and necrotic cell death was observed in the  
310 CDDP and CDDP+MSC groups. When administered with MSC, cell death did not change  
311 statistically ( $p=0.165$ ,  $0.62$ ,  $0.318$ ,  $0.535$ , respectively). When the control group and MSC  
312 groups are compared, no differences were identified for the four parameters ( $p=0.62$ ,  $0.62$ ,  
313  $0.805$ ,  $0.71$ ). Systemic MSC administration did not affect tumor cell death.

314 Mean apoptosis and necrosis percentages are given in Table 1.

315 Table 1: Mean Percentages of Flow Cytometry Annexin V+PI Cell Death Parameters

| Group    | % | Early Apoptosis | Late Apoptosis | Total Apoptosis | Necrosis     |
|----------|---|-----------------|----------------|-----------------|--------------|
| Control  |   | 0.8             | 6.34           | 7.14            | 3.98         |
| CDDP     |   | <b>14.07</b>    | <b>15.14</b>   | <b>29.21</b>    | <b>21.03</b> |
| MSC      |   | 1.66            | 5.57           | 7.23            | 6.21         |
| MSC+CDDP |   | <b>13.57</b>    | <b>15.29</b>   | <b>28.86</b>    | <b>20.16</b> |

316

### 317 **Light Microscopic Assessment**

318 Mean necrosis of tumor tissues was 12.85% in the control group, 57.14% in the CDDP  
319 group, 3.71% in the MSC group and 35.00% in the MSC+CDDP group. Hematoxylin eosin  
320 staining of tumor tissues found necrosis was higher in the CDDP group and CDDP+MSC group  
321 compared to the control and MSC groups ( $p=0.001$ ,  $p=0.011$ ). The CDDP+MSC group  
322 appeared to have lower tumor necrosis rates compared to the CDDP group ( $p=0.017$ ). Tumor  
323 sections observed solid tumor growth patterns in live tumor areas in all four groups. There was  
324 undifferentiated appearance. Differentiation findings were not observed in rosette formation.  
325 Vascularization was pronounced. Both pushing growth in the form of nodules and infiltrative  
326 growth was observed in subdermal fat connections and muscle tissue. Postmortem  
327 investigations of mice found no areas of suspected metastasis of macroscopic tumors. Notable  
328 pathology was not observed in other organs. Histopathology of liver, lung, kidney, heart, spleen  
329 and brain tissue sections was normal.

330 There was no degradation in histomorphology of inner ear sections. There was no flat  
331 epithelium (FE) appearance secondary to cellular damage in severe sensorial hearing loss. The

332 cytoarchitecture of the Corti organ was normal. Interior and exterior hair cells could be selected.  
333 However, there were pyknotic changes supporting cell death in the spiral ganglion of the CDDP  
334 group. FE is seen in humans and mice with profound sensorineural hearing loss and/or vertigo.  
335 Various factors, including ototoxic drugs, noise exposure, aging, and genetic defects, can  
336 induce FE. Both hair cells and supporting cells are severely damaged in FE, and the normal  
337 cytoarchitecture of the sensory epithelium is replaced by a monolayer of very thin, flat cells  
338 with irregular contours.

### 339 **Determination of Mesenchymal Stem Cell Counts with Flow Cytometry in Tumor Tissue**

340 In the control group and the CDDP group, triple CD34+, CD44+ and CD117- expression was  
341 not identified, while it was 3% in the MSC group and 5.16% in the MSC+CDDP group. Flow  
342 cytometry of single cell suspension from tumor tissue assessed with triple labeling identified  
343 higher MSC numbers in tumor tissue of groups administered MSC compared to the control and  
344 CDDP groups, as expected ( $p=0.001$ ). There was no statistical difference between the MSC and  
345 MSC+CDDP groups. These findings show systemic administration of MSC entered tumor  
346 tissue through circulation [21].

347 Expression of cochlear cell proteins calretinin, math-1 and myosin2A in the inner ear were  
348 identified to be higher in the group administered MSC. On hearing tests, the 15-decibel loss at  
349 12, 16, 20 and 32 kHz frequencies with CDDP in both ears was observed to be resolved with  
350 administration of MSC [22-24].

### 351 **Apoptosis Analysis with TUNEL on Paraffin Sections**

352 Mean apoptotic cells in tumor tissue were identified as 2.2% (2-8) in the control group; 30% (5-45)  
353 in the CDDP group; 5.43% (1-15) in the MSC group; and 28.57% (15-55) in the CDDP+MSC  
354 group. Statistical analysis identified more apoptosis in the CDDP and CDDP+MSC groups

355 compared to the control and MSC groups ( $p=0.007, 0.001, 0.004$ ). There was no difference between  
356 the CDDP and CDDP+MSC groups ( $p=0.456$ ) (Fig 5) (Fig 6).

357 Apoptosis was not identified in the Corti organ in the inner ear, while values in the spiral ganglion  
358 were mean 26% and 28% in the CDDP and CDDP+MSC groups. Statistically significant high levels  
359 of apoptotic cells were identified in these groups compared to the control and MSC groups  
360 ( $p=0.001$ ).

361

362 Figure 5. MSC (CD34+ CD44+ and CD117-) flow cytometer of of fresh tumor tissue single  
363 cell suspension in IV MSC applied (upper 3 figs) and MSC+CDDP applied (lower 3 figs) mice.

364 Fig 6: Apoptotic cells stained in brown color in Stria vascularis layer of cochlea in CDDP group  
365 (TUNEL method, DAB, x400) (A). No apoptosis was observed in Control group (B) (x200)

366

### 367 **Brainstem Auditory Evoked Potential Test Results**

368 There was no statistically significant difference between groups in terms of baseline ABR  
369 values ( $p>0.05$ ). According to ABR measurements conducted on the 7th day of the study,  
370 hearing thresholds for all frequencies except 8 kHz were significantly deteriorated in the  
371 CDDP-treated group in comparison to the other 3 groups ( $p<0.05$ ). In the CDDP + MSC treated  
372 group, hearing thresholds were not statistically different from controls and the MSC treated  
373 group (Fig 7).

374 Figure 7. Mean hearing thresholds + standart deviations in all groups at 7th day of the study.

### 375 **Assessment of Mesenchymal Stem Cell Differentiation in the Inner Ear**

376 Calretinin begins to be expressed in the inner ear on the 13<sup>th</sup> day of the embryonic period  
377 and is a marker that continues to be expressed until the adult period. In the control, CDDP and  
378 MSC+CDDP groups, calretinin expression was positive in the organ Corti and spiral ganglion.



379 In the MSC group, calretinin expression was negative in organ Corti tissues. Systemic  
380 administration of MSC reduced the expression of calretinin in ear tissue.

381         Developing hair cells express Math-1, while it is not expressed by non-sensorial cells.  
382 Math-1 has positive expression in immature and hair cells. In the control and CDDP groups,  
383 low expression of Math-1 was identified. In the MSC group and MSC+CDDP groups, Math-1  
384 expression was increased ( $p=0.04$ ).

385         Myosin2A plays an active role in reorganization within the cochlea. Suppression of this  
386 antigen causes defects in the cellular pattern. Myosin2A had positive expression pattern in all  
387 control, CDDP, MSC and MSC+CDDP groups. There was no difference observed between the  
388 groups ( $p>0.05$ ).

389 Among these three parameters, Math-1 expression increased in the inner ear after systemic  
390 administration of MSC and it undertakes a marker role for cochlear effect.

## 391 **DISCUSSION**

392         Sensorineural hearing loss caused by CDDP of 60% in the childhood period and 50%  
393 in adults disrupts quality of life. As a result, development studies for potential protective agents  
394 are currently in progress [25]. However, apart from the use of sodium thiosulfate in childhood  
395 cancers, there is no agent with proven reliability and benefit at the level of clinical studies.  
396 Agents used in current pre-clinical trials include CDK2 inhibitors, G-protein coupled receptor  
397 (GPCR) agonists and lovastatin. In our study, we obtained findings that systemic MSC cellular  
398 treatment simultaneous to CDDP reduced the ototoxicity side effect without disrupting the  
399 antitumoral effect at the level of in vivo animal experiment studies. We assessed this effect in  
400 terms of apoptotic and necrotic effects. MSC was tested with triple markers, and we attempted  
401 to measure the contribution to the protective mechanism against damage with immature  
402 cochlear cell markers in the inner ear.

403           A limitation of our study is that we did not include a local administration model for  
404 transtympanic, intracochlear MSC. We could not model MSC cell administration within the  
405 inner ear at the dimension of nude mice under our laboratory conditions. Our study only  
406 includes systemic intravenous MSC administration through the tail vein. It is very difficult for  
407 many medications to access the interior of the cochlea. CDDP induces hearing loss by damaging  
408 sensorial cells especially external hair cells, stria vascularis cells and spiral ganglion cells in the  
409 inner ear [26]. Migration of MSC to this region via circulation is not an expected situation. We  
410 think the effect is possibly due to mediation by MSC-derived soluble factors in an environment  
411 with systemic oxidative stress.

412           Kasagi et al. labeled MSC with green fluorescent protein in culture medium and  
413 transplanted them into the posterior semicircular canal of mice. At the end of this study, MSC  
414 had differentiated to fibrocyte-like cells in the cochlea and did not harm hearing functions [26].  
415 Lin et al. researched an inductive method to differentiate MSC derived from bone marrow into  
416 hair cells in the cochlea. As a result of culturing MSC in medium without serum containing  
417 EGF, IGF-1 and N2/B27 in coculture with neurons for two weeks, they observed differentiation  
418 into cells like hair cells expressing myosin VIIa [27]. If embryonic stem cells locally  
419 administered to the inner ear lower high potassium concentration within toxic endolymph, they  
420 showed that they may survive in normal ear epithelium and flat epithelium for up to 7 days.  
421 However, there is a need for new studies about hair cell differentiation [27]. In our study we  
422 investigated the effects of systemic MSC.

423           Lopez-Juarez et al. stimulated pluripotent stem cells to obtain otic progenitor cells and  
424 they transplanted these cells into the cochlea in an ototoxic guinea pig model. These cells  
425 remained viable for 4 weeks and showed molecular features of early sensorial differentiation  
426 [28]. This current study opened the horizons in terms of treatment of ototoxicity with stem cells.  
427 However, there are important gaps in relation to organization of cells in the organ Corti. Our

428 study is different to this study in terms of examining prevention of ototoxicity with systemic  
429 MSC administered simultaneous to CDDP chemotherapy, which causes hearing loss without  
430 severe cellular injury,

#### 431 **Conclusion**

432 For NB treatment, protective agents are frequently researched to reduce side effects due to the  
433 dose-limiting effects of CDDP side effects. It is essential that these agents do not disrupt the  
434 anti-tumor effect. In our study, systemic administration of MSC as cellular treatment was  
435 identified to have a protective effect against the ototoxicity side effect of CDDP and did not  
436 disrupt anti-tumoral efficacy in a nude mice NB model. Planning of clinical studies may be  
437 considered; however, firstly it is necessary to investigate the effect mechanisms of MSC on the  
438 organ Corti in terms of differentiation, regeneration, systemic effect and epithelial  
439 mesenchymal transformation.

#### 440 **Acknowledgement:**

441 This study was presented as a poster numbered 8-1238 at the International Society of Pediatric  
442 Oncology (SIOP) Congress in 2018. This project was financially supported by Dokuz Eylül  
443 University Rectorate Scientific Research Projects Coordinator with project number  
444 2018.KB.SAG.076 for purchasing of consumables.

#### 445 **RFEFERENCES**

446 1. Yanik GA, Parisi MT, Shulkin BL. Semiquantitative MIBG scoring as a prognostic indicator  
447 in patients with stage 4 neuroblastoma: a report from the Children's Oncology Group. *J Nucl*  
448 *Med.* 2013; 54:541–548.

- 449 2. Matthay KK, Reynolds CP, Seeger RC. Long-term results for children with high-risk  
450 neuroblastoma treated on a randomized trial of myeloablative therapy followed by 13-cis-  
451 retinoic acid: A Children's Oncology Group study. *J Clin Oncol.* 2009; 27:1007–1013.
- 452 3. Olgun Y, Aktaş S, Altun Z, Kırkım G, Kızmazoğlu DÇ, Erçetin AP et al. Analysis of genetic  
453 and non genetic risk factors for cisplatin ototoxicity in pediatric patients. *Int J Pediatr*  
454 *Otorhinolaryngol.* 2016; 90:64-69.
- 455 4. Laverdiere C, Liu Q, Yasui Y, Nathan PC, Gurney JM, Stovall M et al. Long-term outcomes  
456 in survivors of neuroblastoma: A report from the childhood cancer. *J Natl Cancer Inst.* 2011;  
457 12:189-195
- 458 5. De Fine Licht S, Rugbjerg K, Gudmundsdottir T, Bonnesen T.G, Asdahl PH, Holmqvist AS  
459 et al. Long-term inpatient disease burden in the adult life after childhood cancer in scandinavia  
460 (ALiCCS) study: A cohort study of 21,297 childhood cancer survivors. *PLoS Med.* 2017; 14:  
461 e1002296.
- 462 6. Dong PZ. Cisplatin nephrotoxicity: mechanisms and renoprotective strategies, *Kidney Int.*  
463 2008; 73: 994–1007.
- 464 7. Hartmann JT, Lipp H.P. Toxicity of platinum compounds, *Expert Opin Pharmacother.* 2003;  
465 4: 889–901.
- 466 8. Im GJ, Chang JW, Choi J, Chae SW, Ko EJ, Jung HH. Protective effect of Korean red ginseng  
467 extract on cisplatin ototoxicity in HEI-OC1 auditory cells. *Phytother Res.* 2010;24(4):614-21.
- 468 9. Dinh CT, Chen S, Bas E, Dinh J, Goncalves S, Telischi Fet al. Dexamethasone Protects  
469 Against Apoptotic Cell Death of Cisplatin-exposed Auditory Hair Cells In Vitro. *Otol Neurotol.*  
470 2015; 36:1566-71.

- 471 10. Kim HS, An YS, Chang J, Choi J, Lee SH, Im GJ. Protective effect of resveratrol against  
472 cisplatin-induced ototoxicity in HEI-OC1 auditory cells., *Int J Pediatr Otorhinolaryngol.* 2015;  
473 79:58-62.
- 474 11. Cho SI, Lee JE, Do NY. Protective effect of silymarin against cisplatin-induced ototoxicity.  
475 *Int J Pediatr Otorhinolaryngol.* 2014;78(3):474-8.
- 476 12. Chang J, Jung HH, Yang JY, Lee S, Choi J, Im GJ et al. Protective effect of metformin  
477 against cisplatin-induced ototoxicity in an auditory cell line. *J Assoc Res Otolaryngol.*  
478 2014;15(2):149-58.
- 479 13. Doğan S, Yazici H, Yalçinkaya E, Erdoğan HI, Tokgöz SA, Sarici F, et al. Protective Effect  
480 of Selenium Against Cisplatin-Induced Ototoxicity in an Experimental Model. *J Craniofac*  
481 *Surg.* 2016; 27(7):e610-e614.
- 482 14. Ahn Jo, Lee Hw, Seo Kw, Kang Sk, Ra Jc, Youn Hy. Anti-tumor effect of adipose tissue  
483 derived-mesenchymal stem cells expressing interferon- $\beta$  and treatment with cisplatin in a  
484 xenograft mouse model for canine melanoma. *PLoS One.* 2013;8(9):e74897.
- 485 15. Ullah I, Subbarao RB, Rho GJ. Human mesenchymal stem cells - current trends and future  
486 prospective. *Biosci Rep* 2015;35:e00191.
- 487 16. Ercetin AP ,Olgun Y, Aktas S, Aydin M, Evin H, Altun Z et al. Effect of Mesenchymal  
488 Stem Cells on Cochlear Cell Viability After Cisplatin Induced Ototoxicity. *J Basic Clin Health*  
489 *Sci* 2020; 4:379-384.
- 490 17. Bayrak S, Aktas S, Altun Z et al. Antioxidant effect of acetyl-L-carnitine against cisplatin-  
491 induced cardiotoxicity. *J Int Med Res.* 2020; 48(8): 1–11.

- 492 18. Altun Z, Olgun Y, Ercetin P, Aktas S, Kirkim G, Serbetcioglu B et al. Protective effect of  
493 acetyl-l-carnitine against cisplatin ototoxicity: role of apoptosis- related genes and pro-  
494 inflammatory cytokines. *Cell Prolif.* 2014; 47: 72-80.
- 495 19. Kalkanis JG., Whitworth C, Rybak LP. Vitamin E Reduces Cisplatin Ototoxicity. *The*  
496 *Laryngoscope.* 2004; 114(3), 538–542.
- 497 20. Lee CH, Lee D, Lee S M, Kim SY. Otoprotective Effects of Zingerone on Cisplatin-Induced  
498 Ototoxicity. *Int J Mol Sci.* 2020; 21(10): 3503.
- 499 21. Berebichez-Fridman R, Montero-Olvera PR. Sources and Clinical Applications of  
500 Mesenchymal Stem Cells: State-of-the-art review. *Sultan Qaboos Univ Med J.* 2018;18:e264–  
501 e277.
- 502 22. Ouji Y, Ishizaka S, Uchiyama-Nakamura F, Wanaka A, Yoshikawa M. Induction of inner  
503 ear hair cell-like cells from Math1-transfected mouse ES cells. *Cell Death Dis.* 2013;4:e700.
- 504 23. Yamamoto N, Okano T, Ma X, Adelstein RS, Kelley MW. Myosin II regulates extension,  
505 growth and patterning in the mammalian cochlear duct. *Development* 2009;136:1977–1986.
- 506 24. Mahmoudian-Sani MR, Jami MS, Mahdavinez A, Amini R, Farnoosh G, Saidijam M. The  
507 Effect of the MicroRNA-183 Family on Hair Cell- Specific Markers of Human Bone Marrow-  
508 Derived Mesenchymal Stem Cells. *Audiol Neurotol* 2018;23:208–215.
- 509 25. Mukherjea D, Dhukhwa A, Sapra A, Bhandari P, Woolford K, Franke J et al. Strategies to  
510 reduce the risk of platinum containing antineoplastic drug-induced ototoxicity. *Expert Opin*  
511 *Drug Metab Toxicol.* 2020 Sep 29:1-18.

- 512 26. Kasagi H, Kuhara T, Okada H, Sueyoshi N, Kurihara H. Mesenchymal stem cell  
513 transplantation to the mouse cochlea as a treatment for childhood sensorineural hearing loss.  
514 Int J Pediatr Otorhinolaryngol. 2013;77(6):936-42. doi: 10.1016/j.ijporl.2013.03.011
- 515 27. Lin Z, Perez P, Sun Z, Liu JJ, Shin JH, Hyrc KL et al. Reprogramming of single-cell-derived  
516 mesenchymal stem cells into hair cell-like cells. Otol Neurotol. 2012;33(9):1648-55.
- 517 28. Lopez-Juarez A, Lahlou H, Ripoll C, Cazals Y, Brezun JM, Wang Q et al. Engraftment of  
518 Human Stem Cell-Derived Otic Progenitors in the Damaged Cochlea. Mol Ther. 2019;  
519 27(6):1101-1113.

520

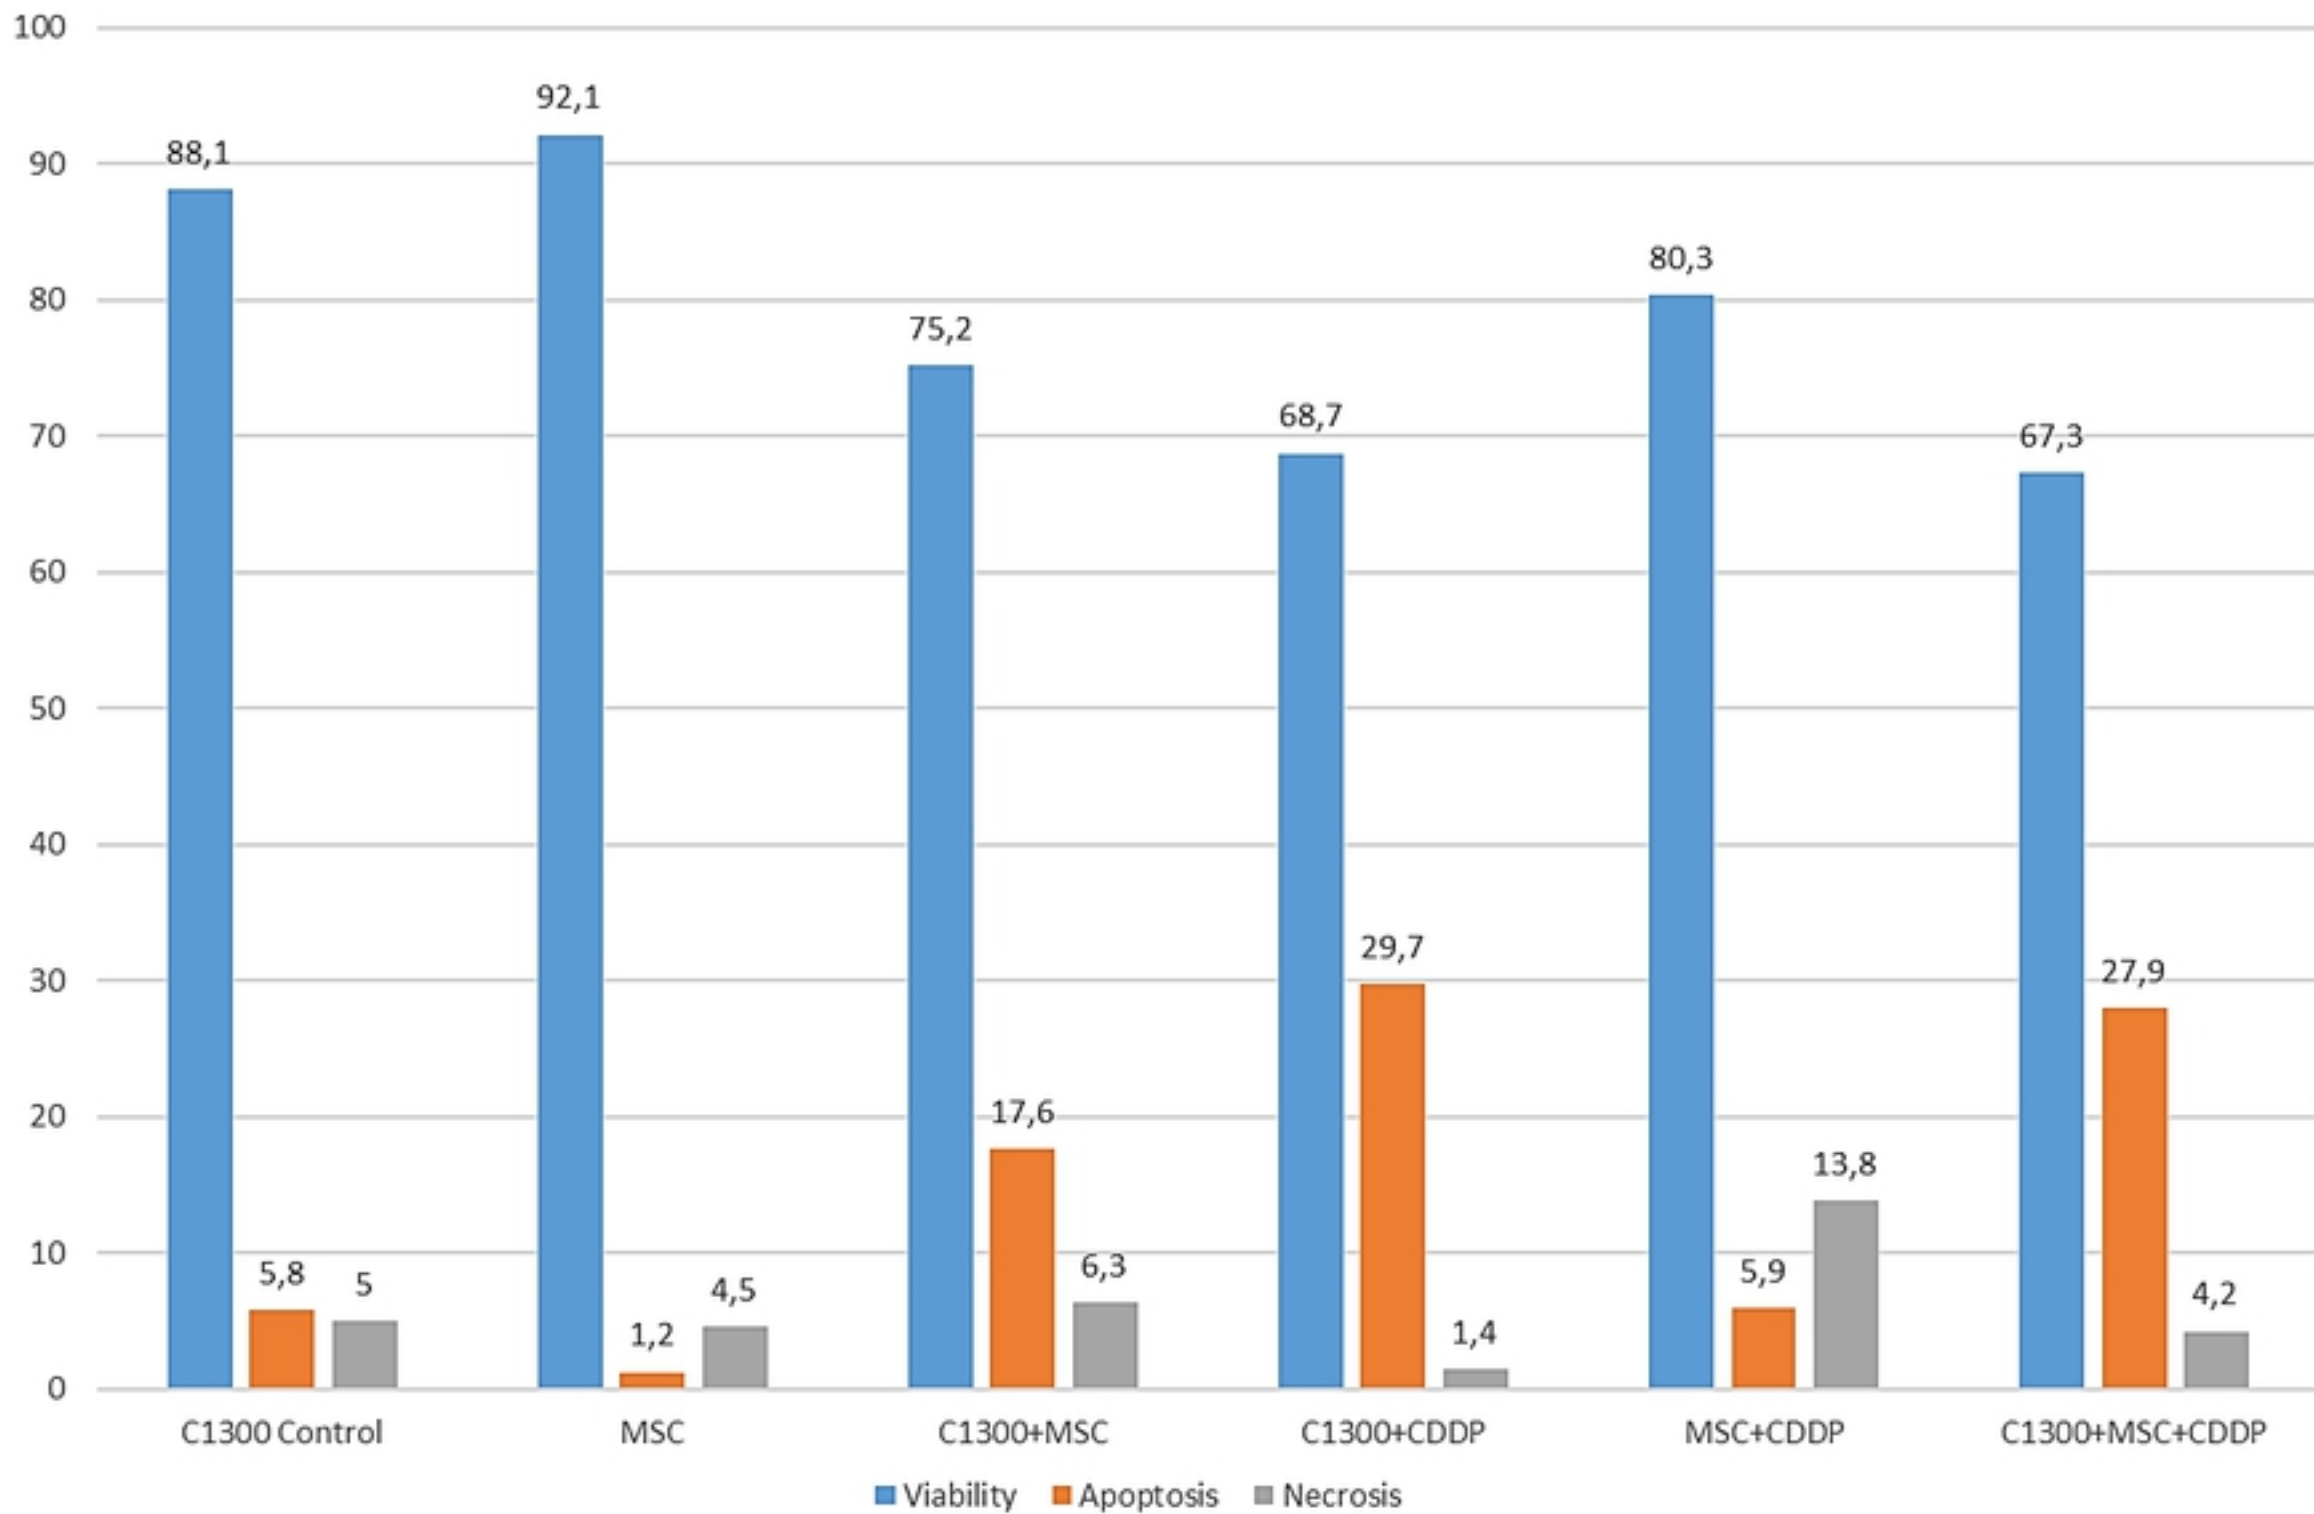

Figure 1



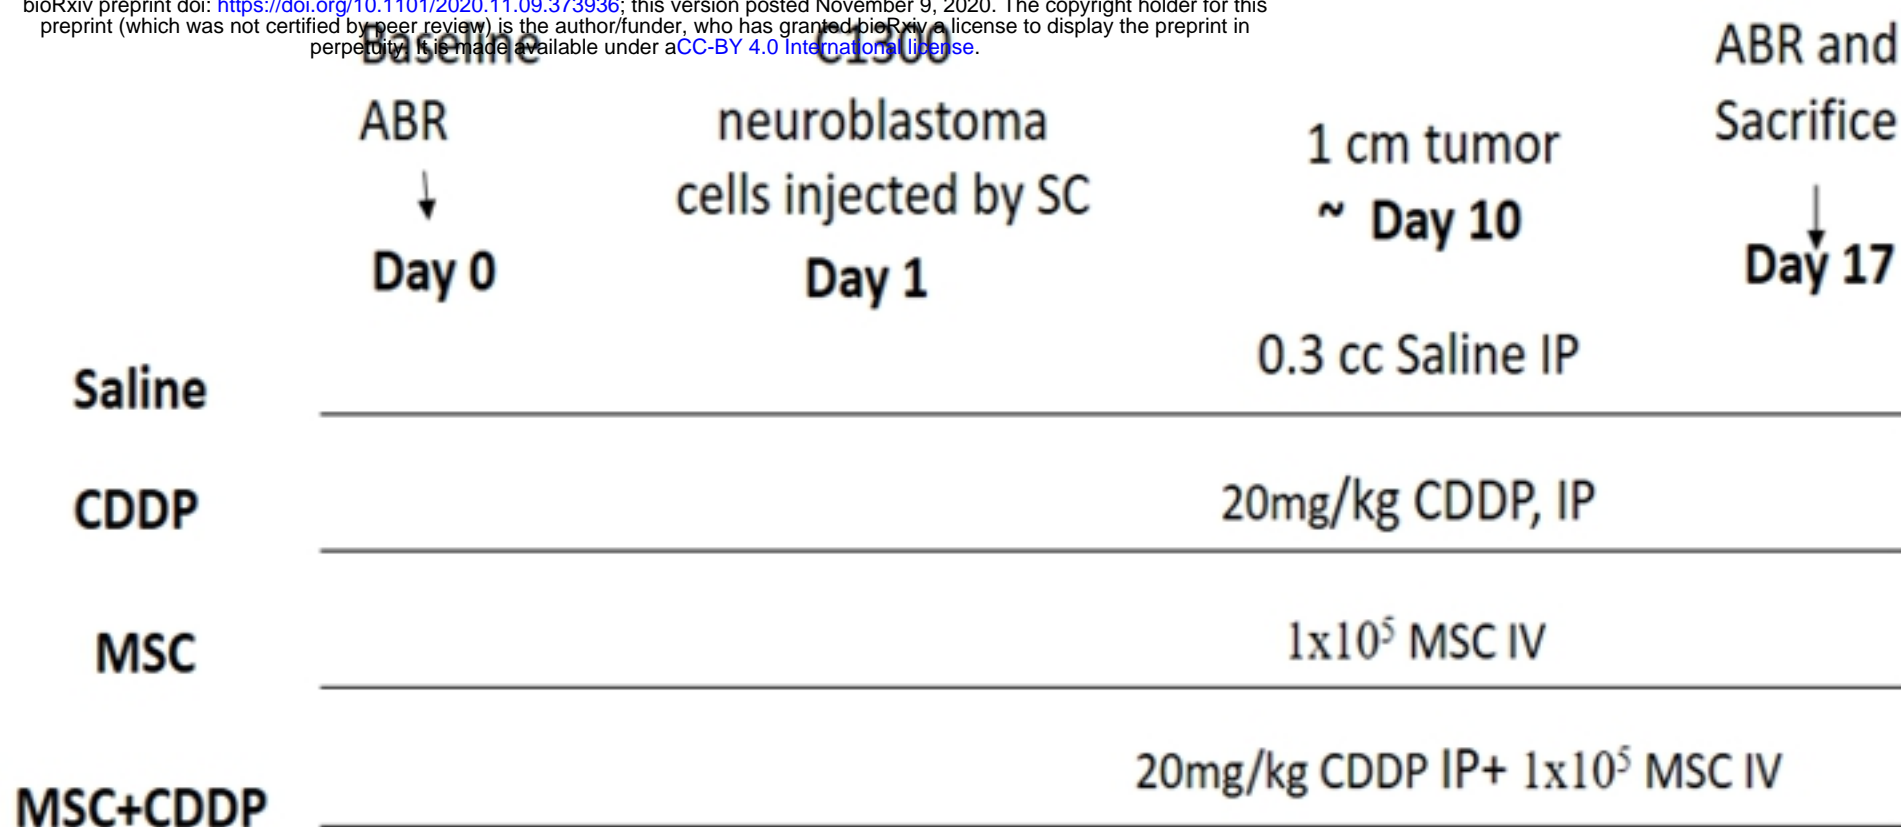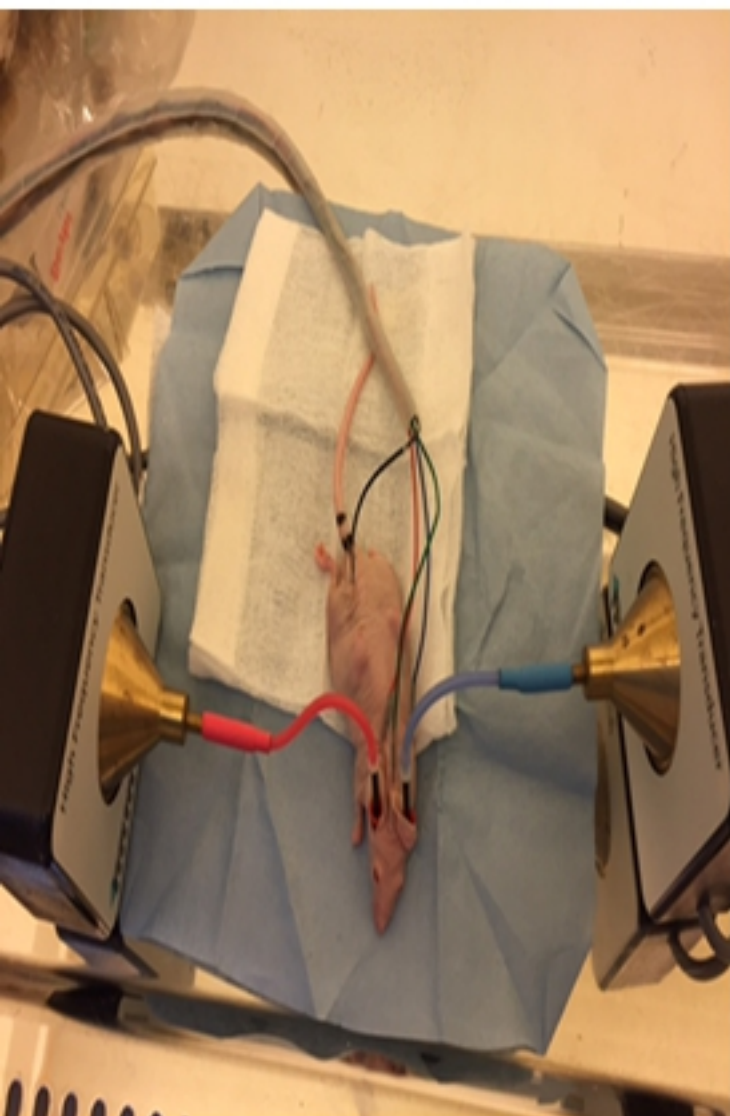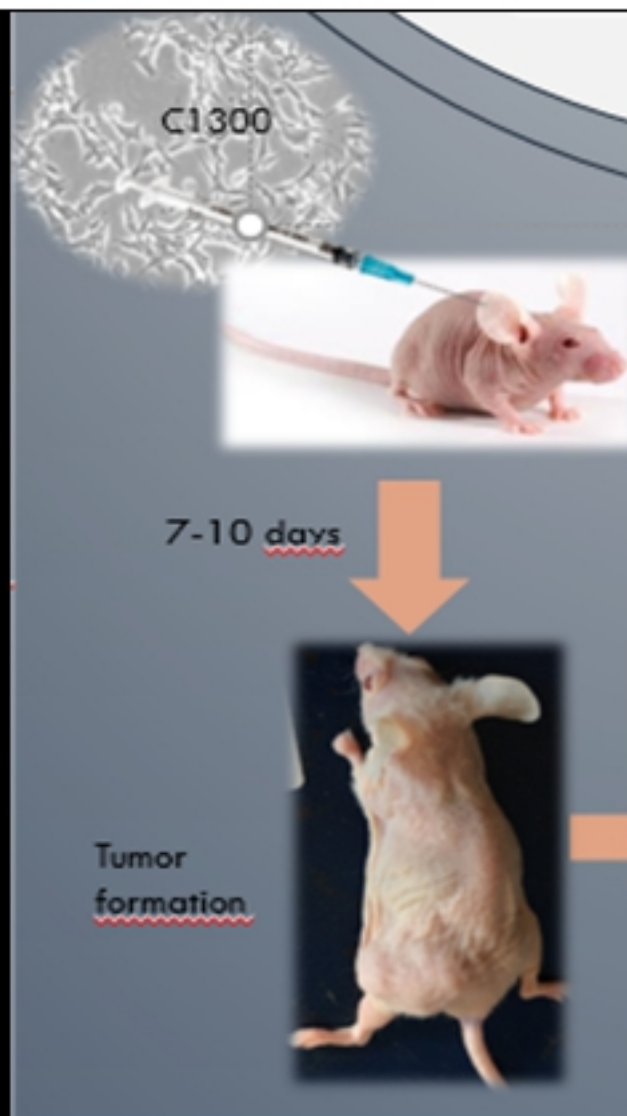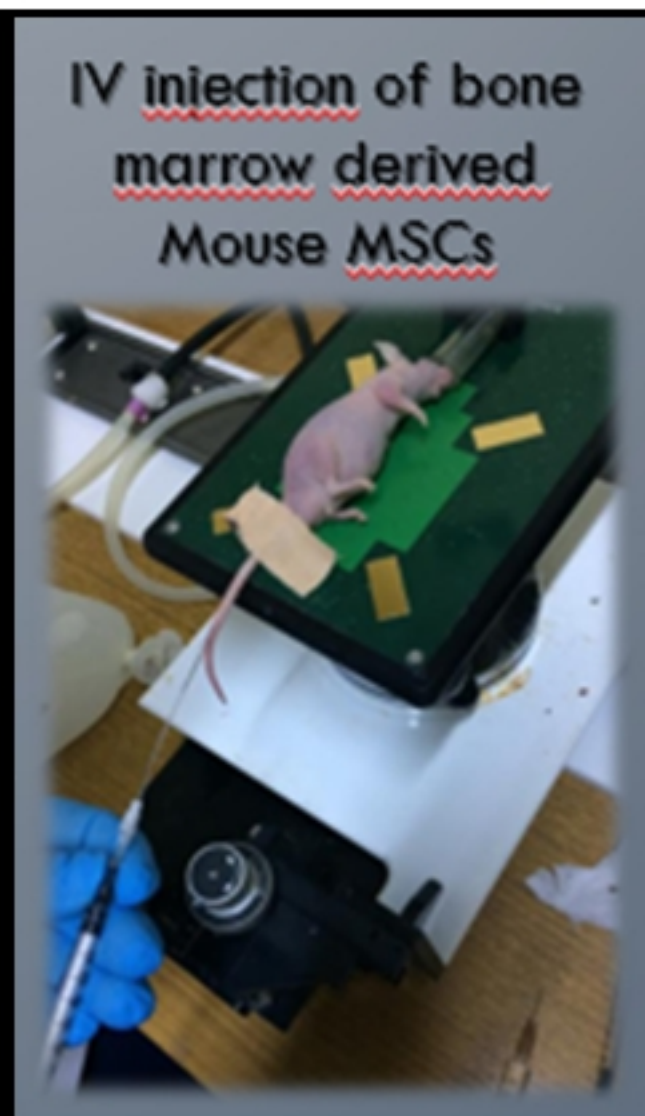

Figure 2

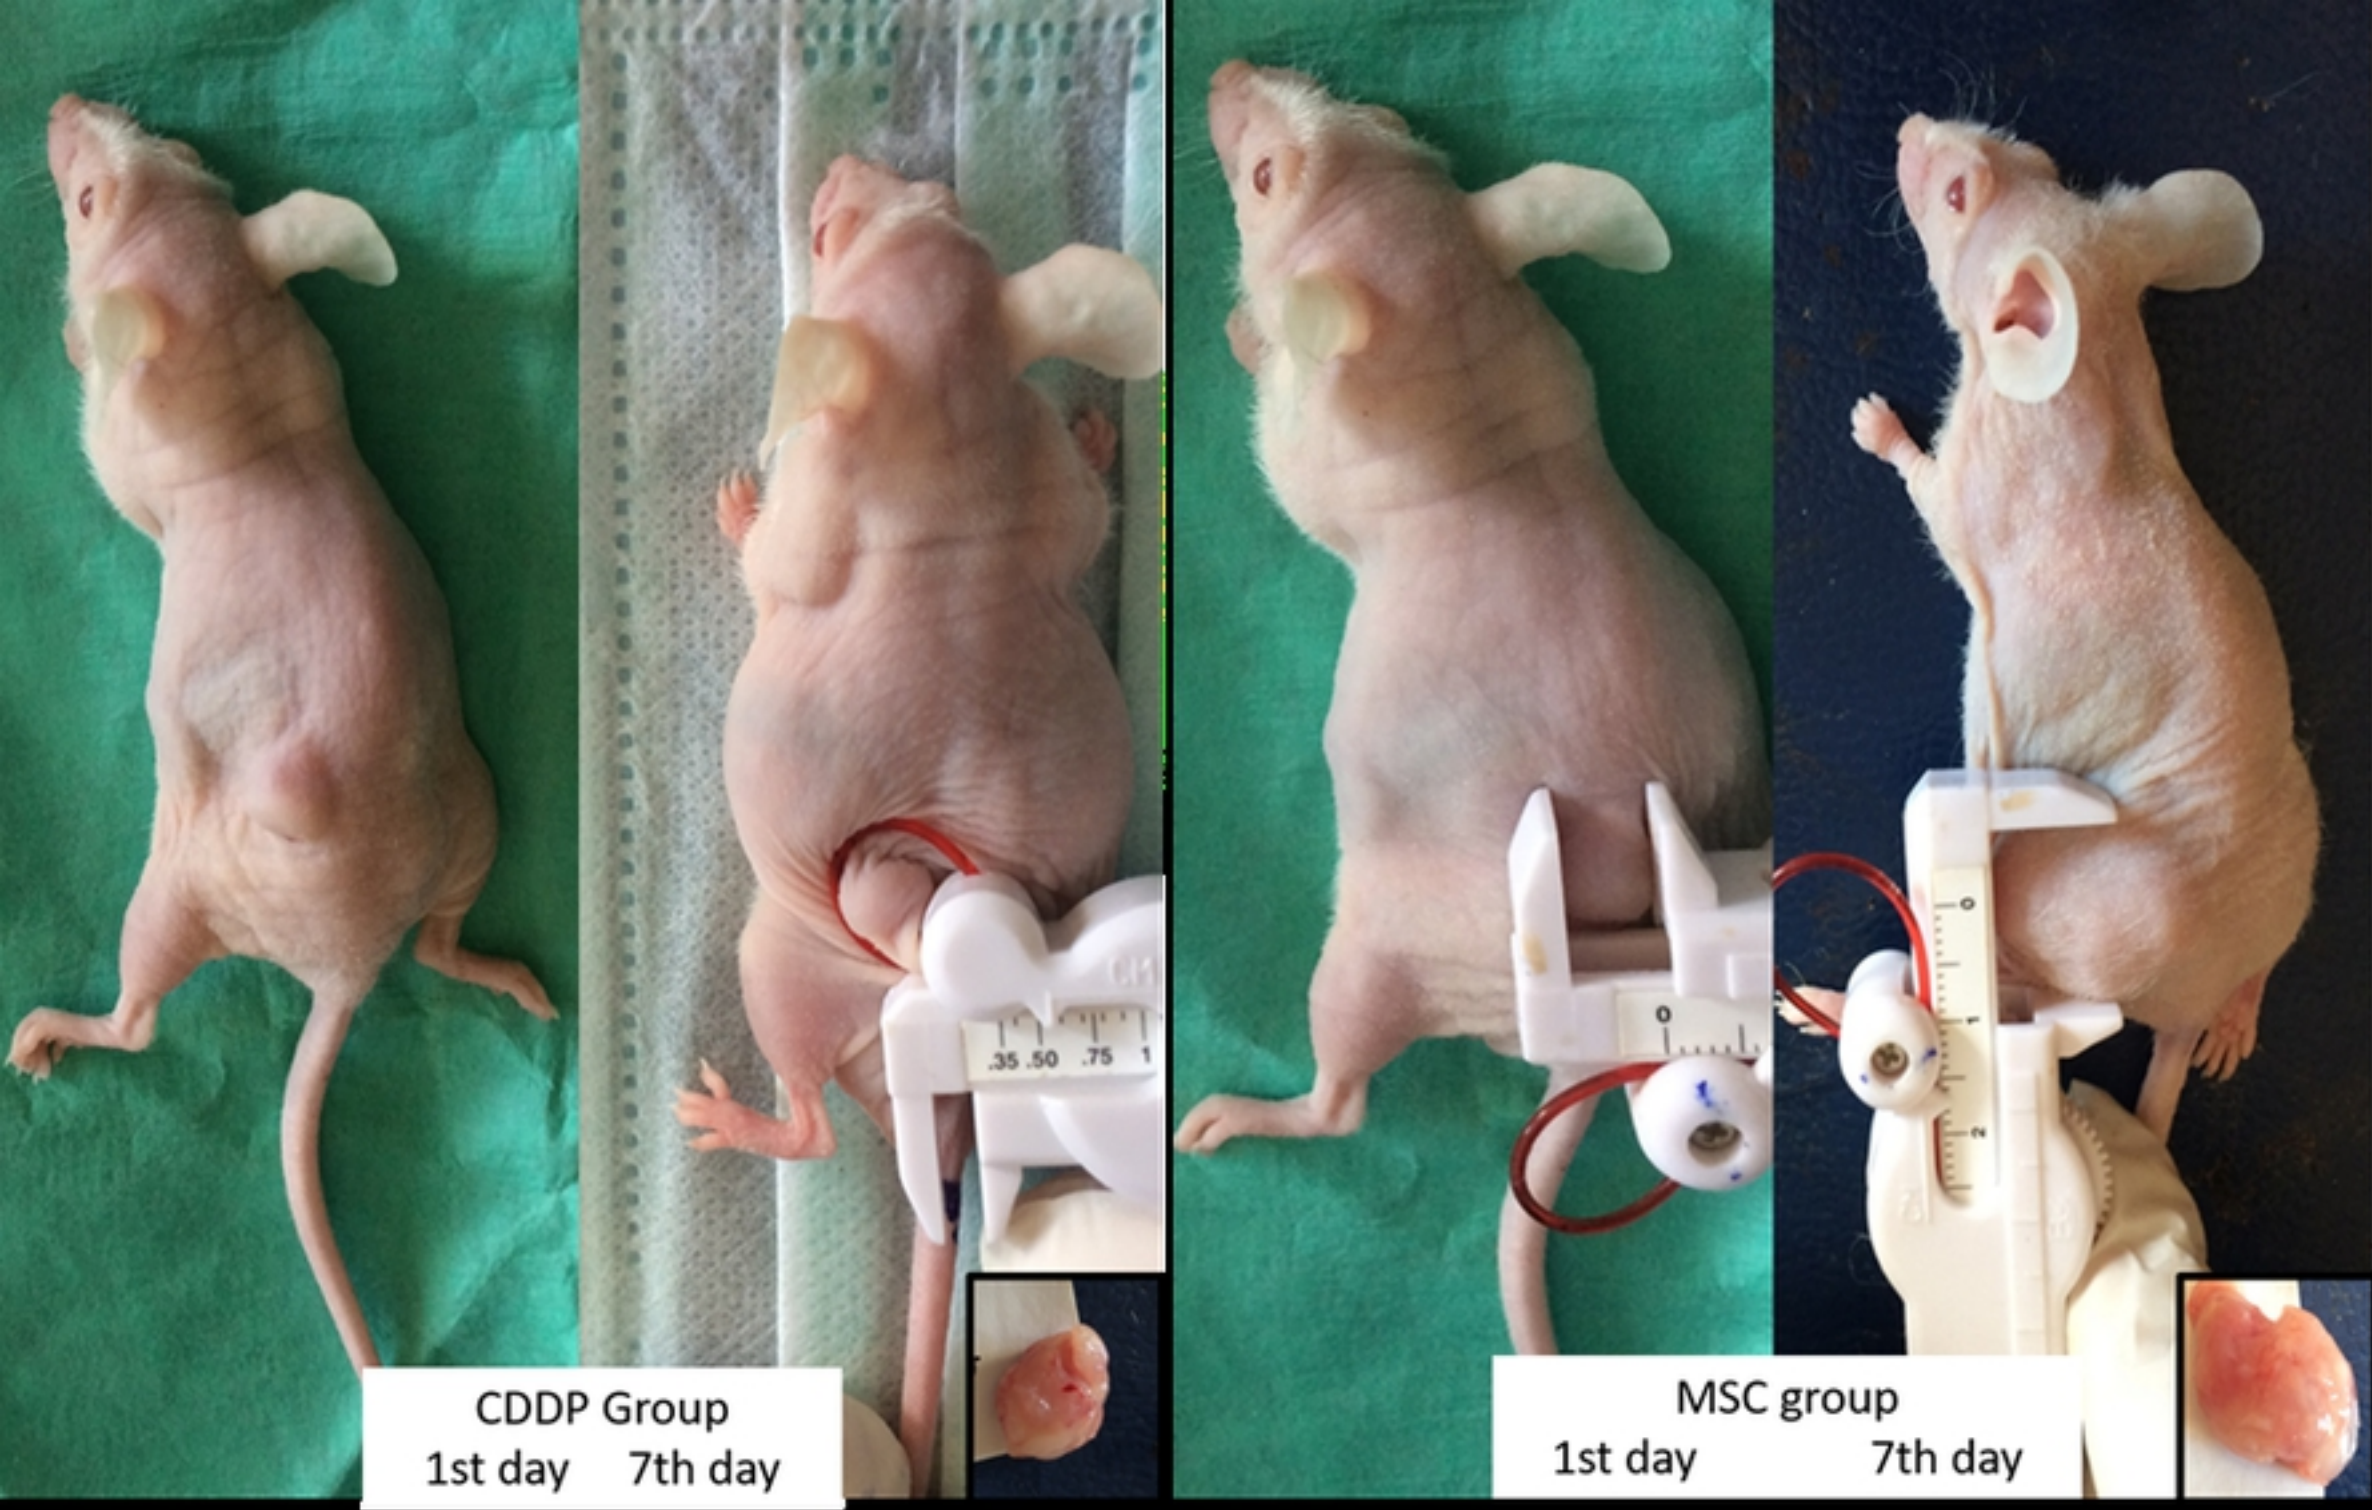

Figure 3

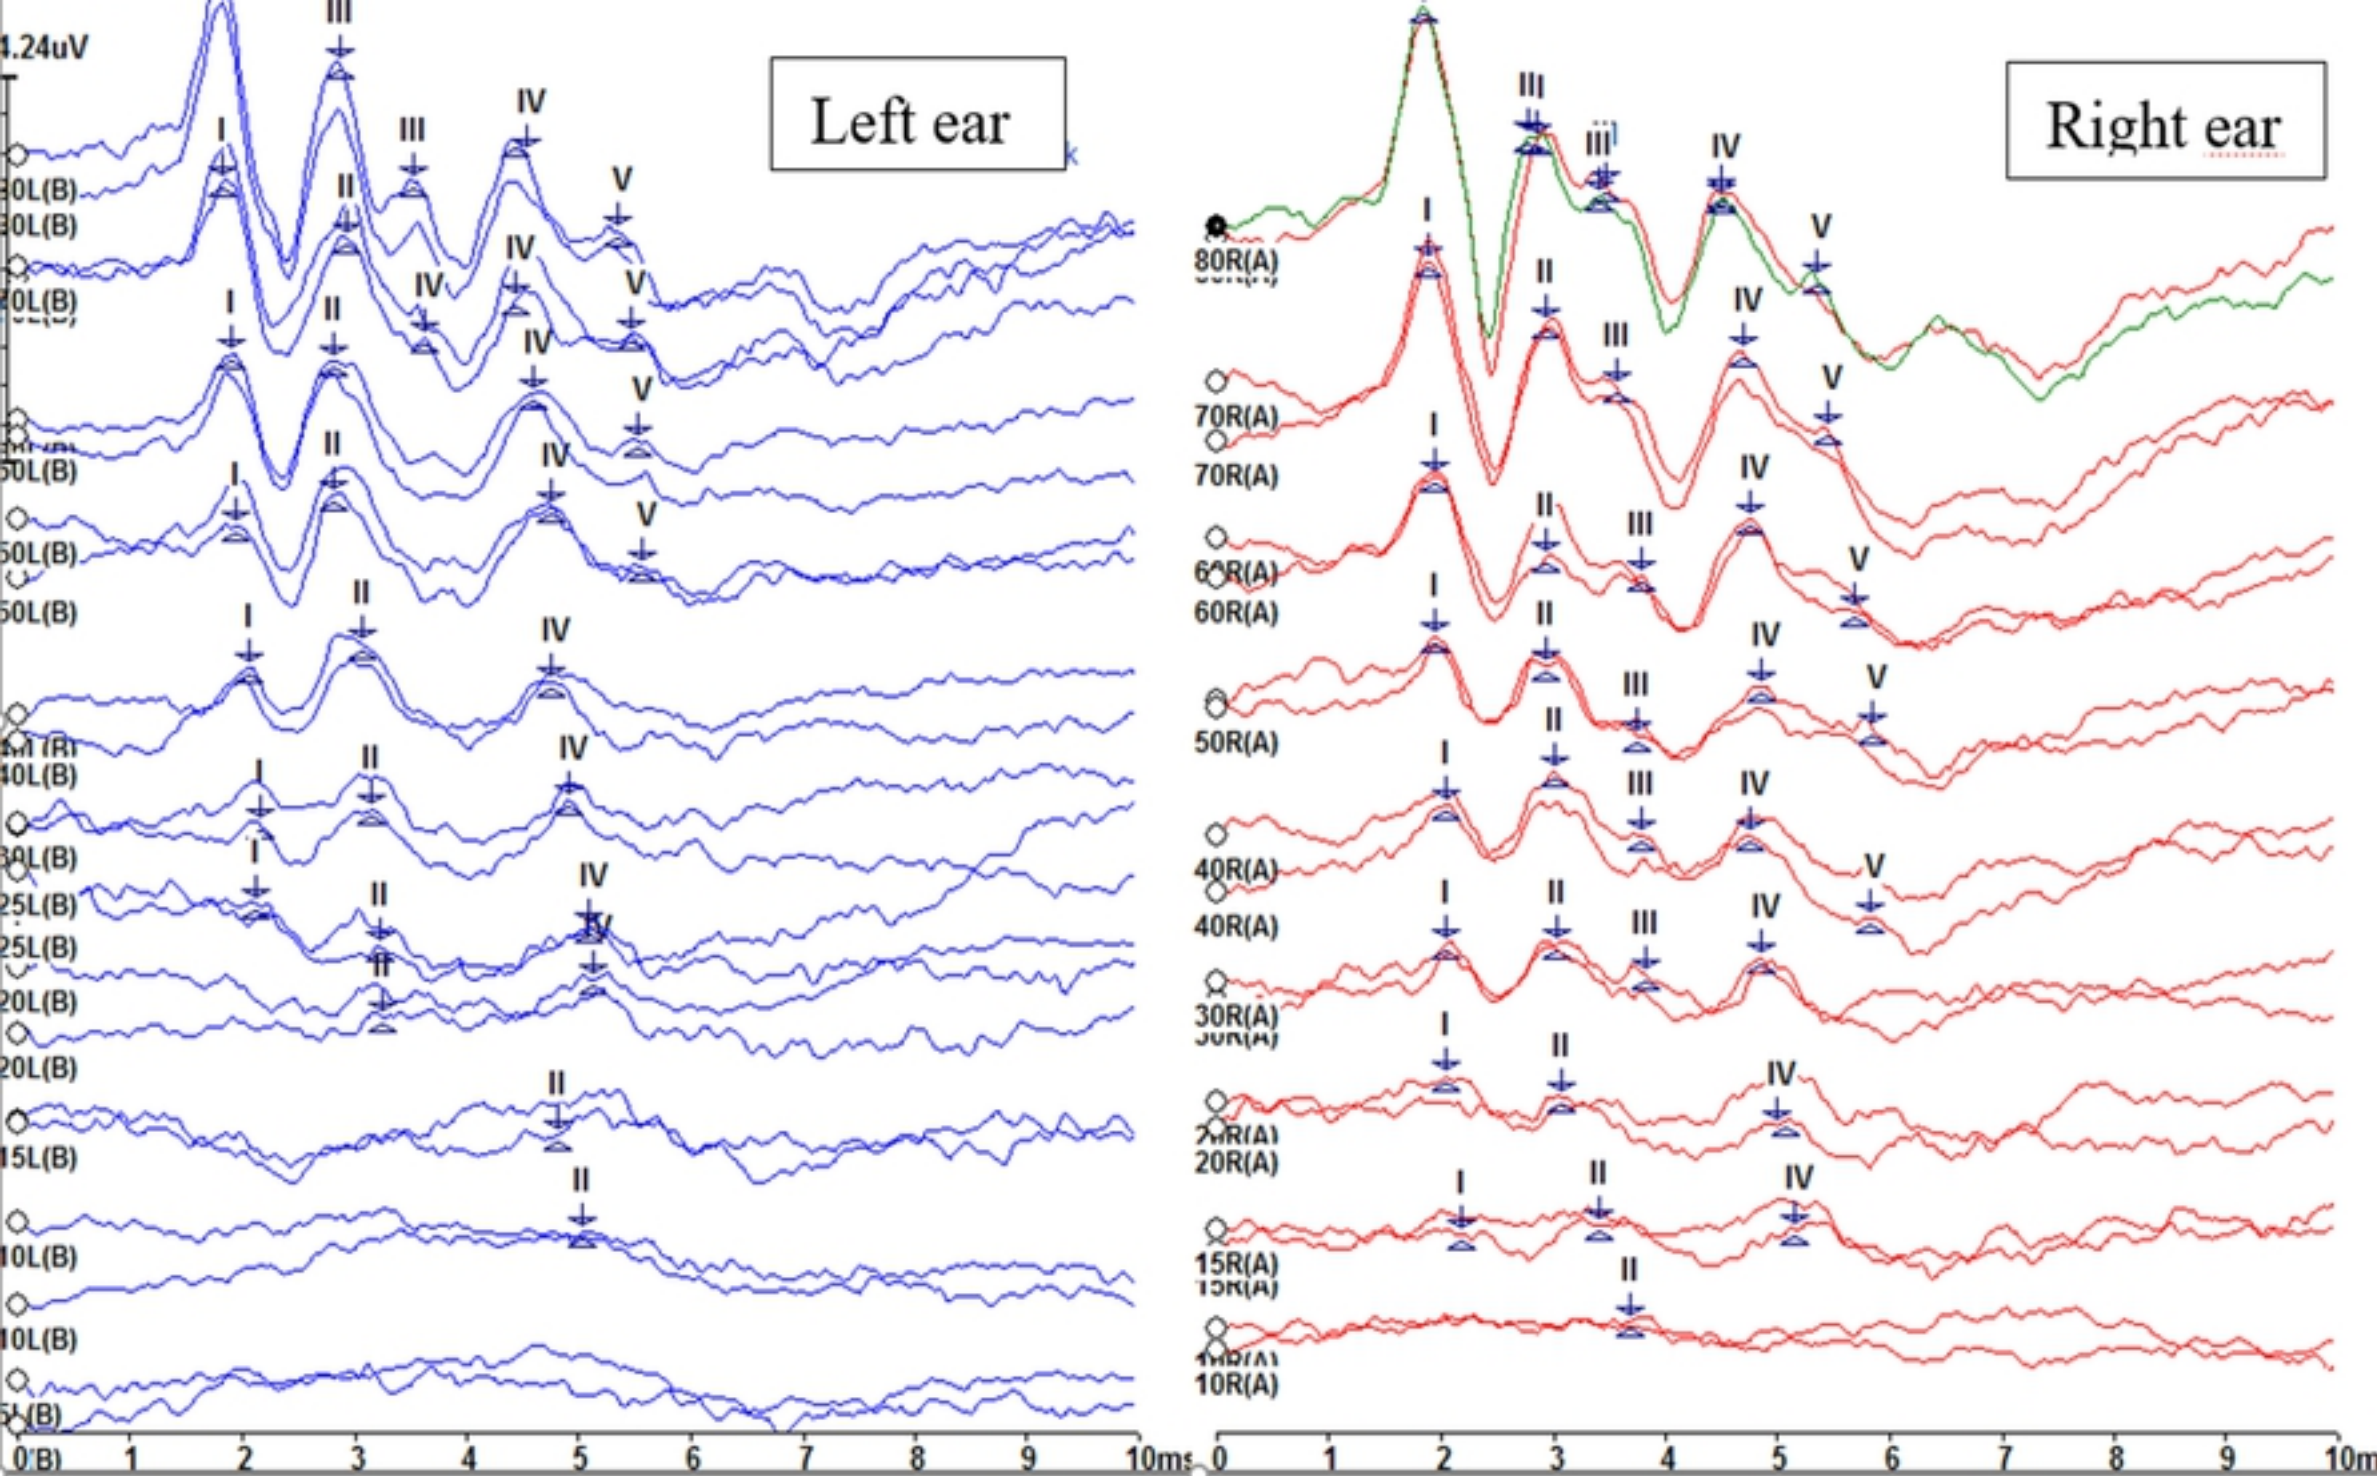

Figure 4

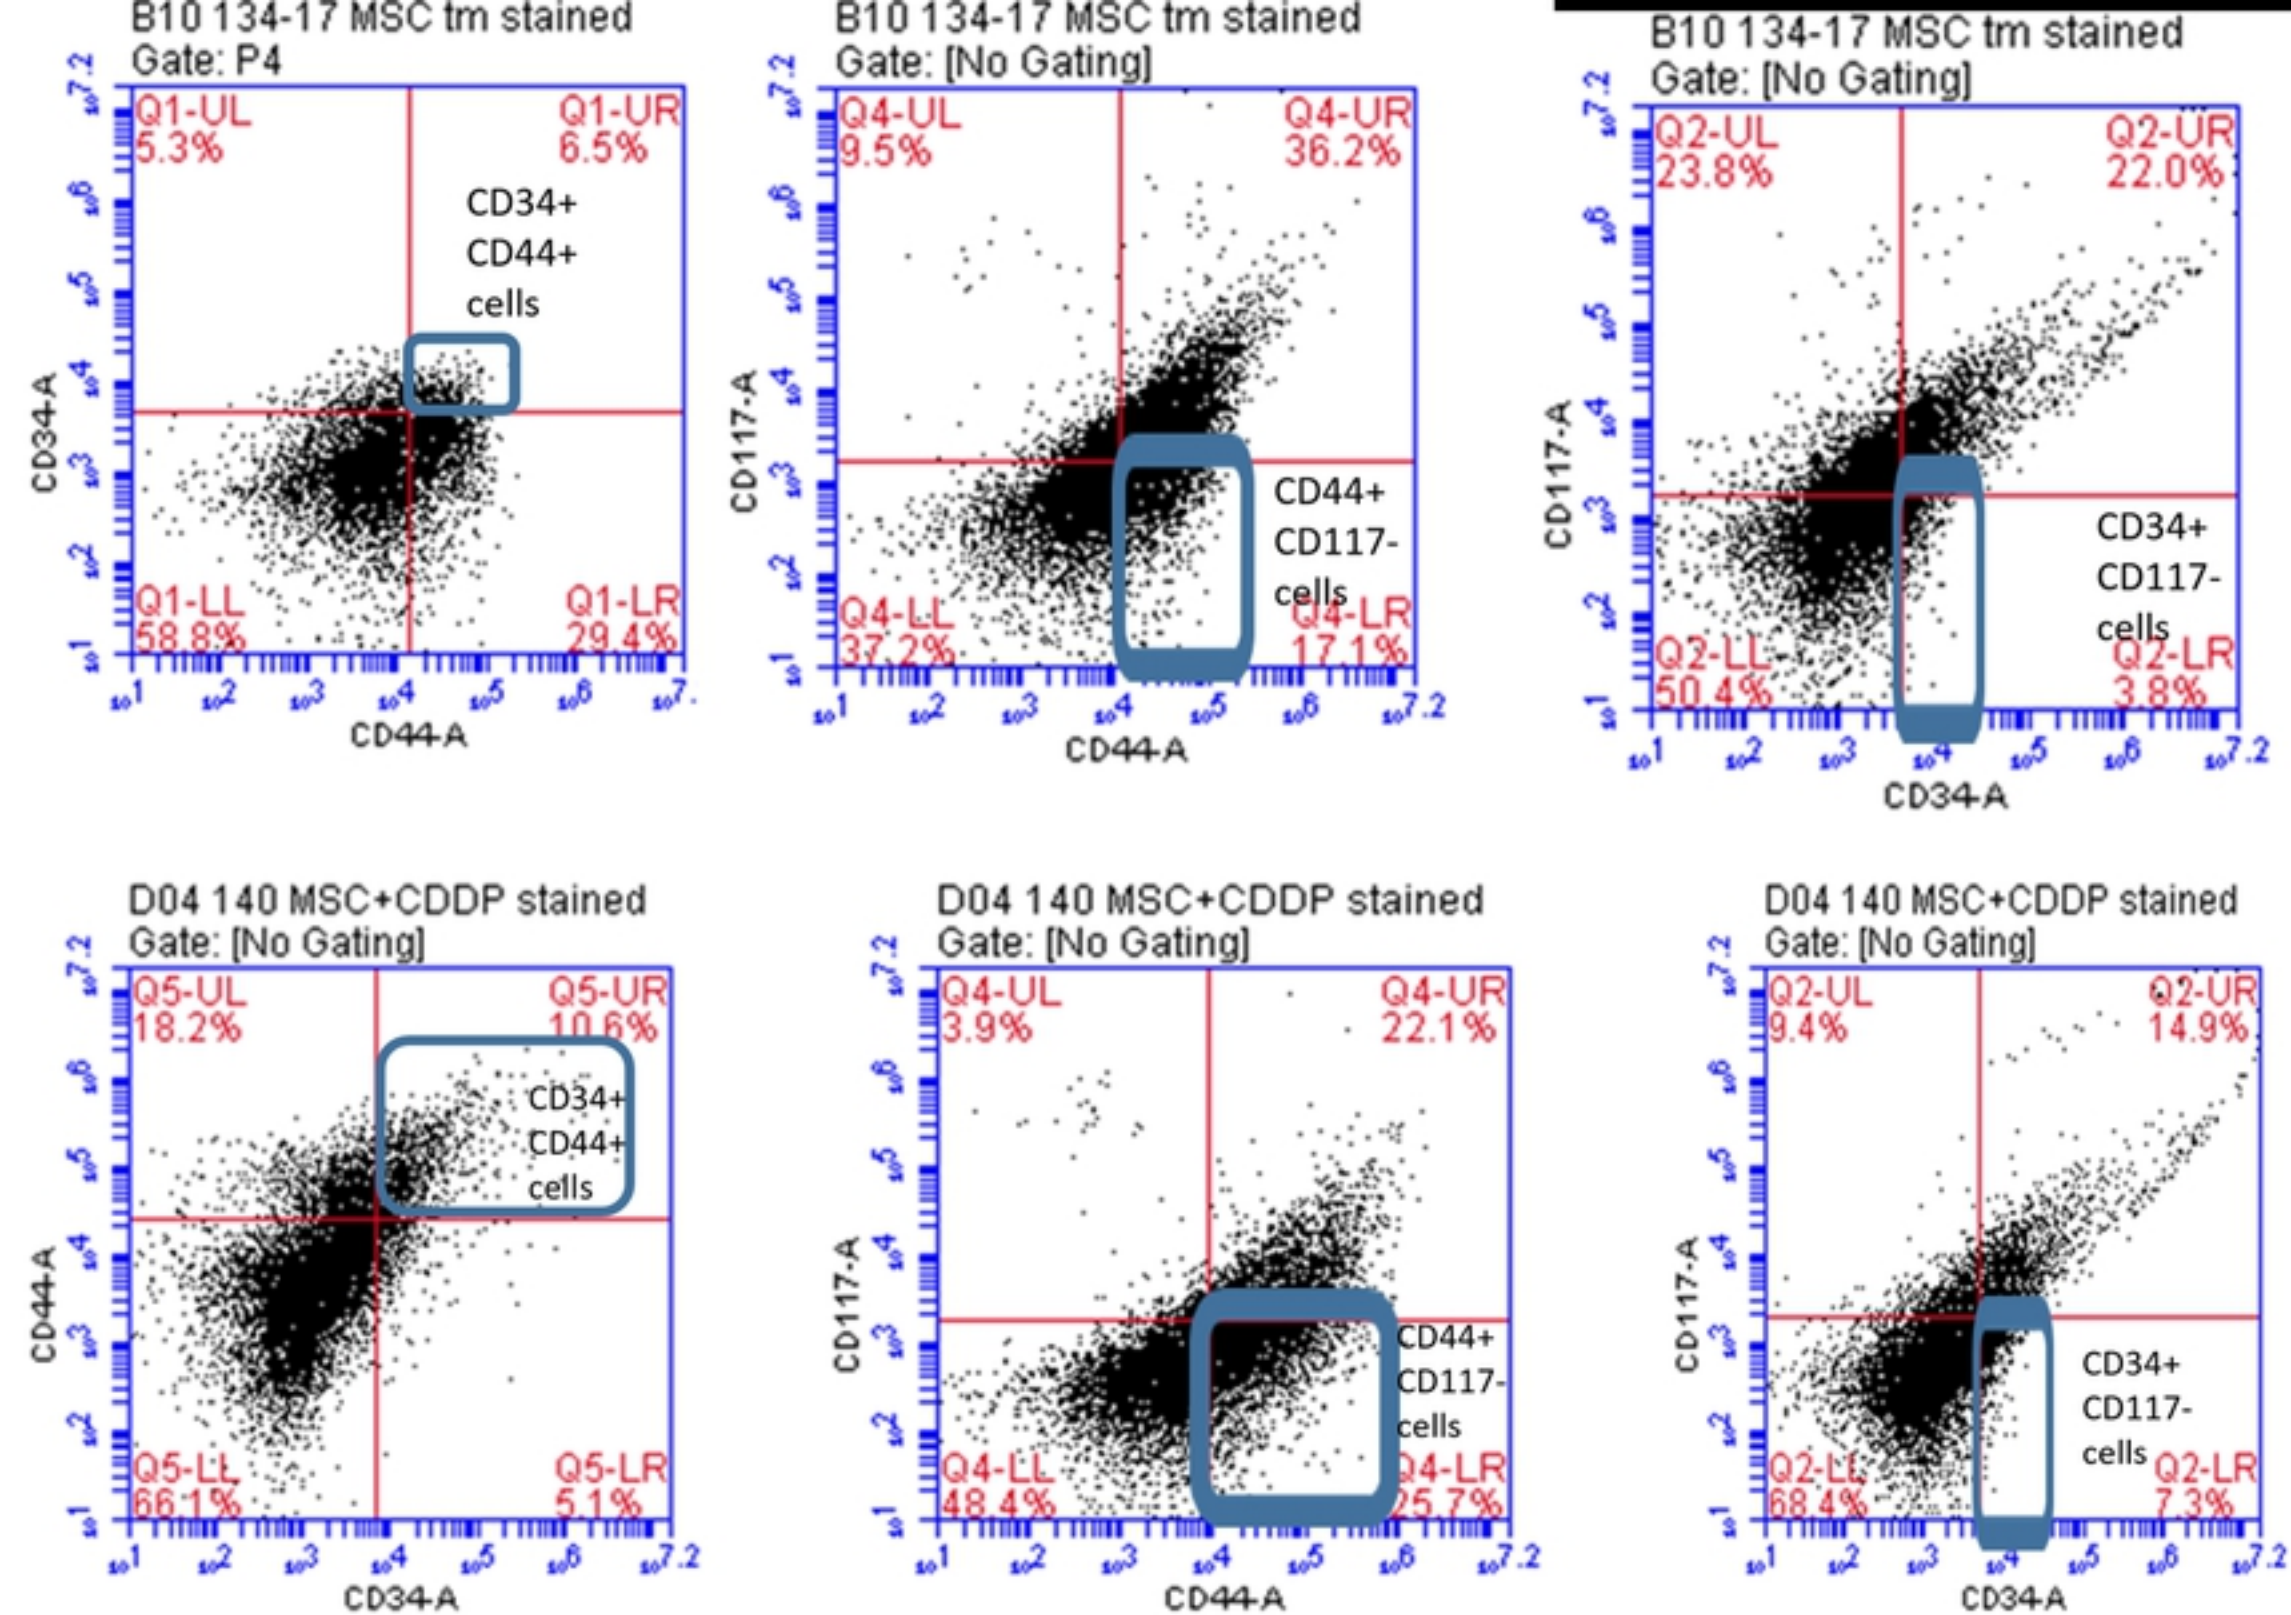

Figure 5

bioRxiv preprint doi: <https://doi.org/10.1101/2020.11.09.373936>; this version posted November 9, 2020. The copyright holder for this preprint (which was not certified by peer review) is the author/funder, who has granted bioRxiv a license to display the preprint in perpetuity. It is made available under aCC-BY 4.0 International license.

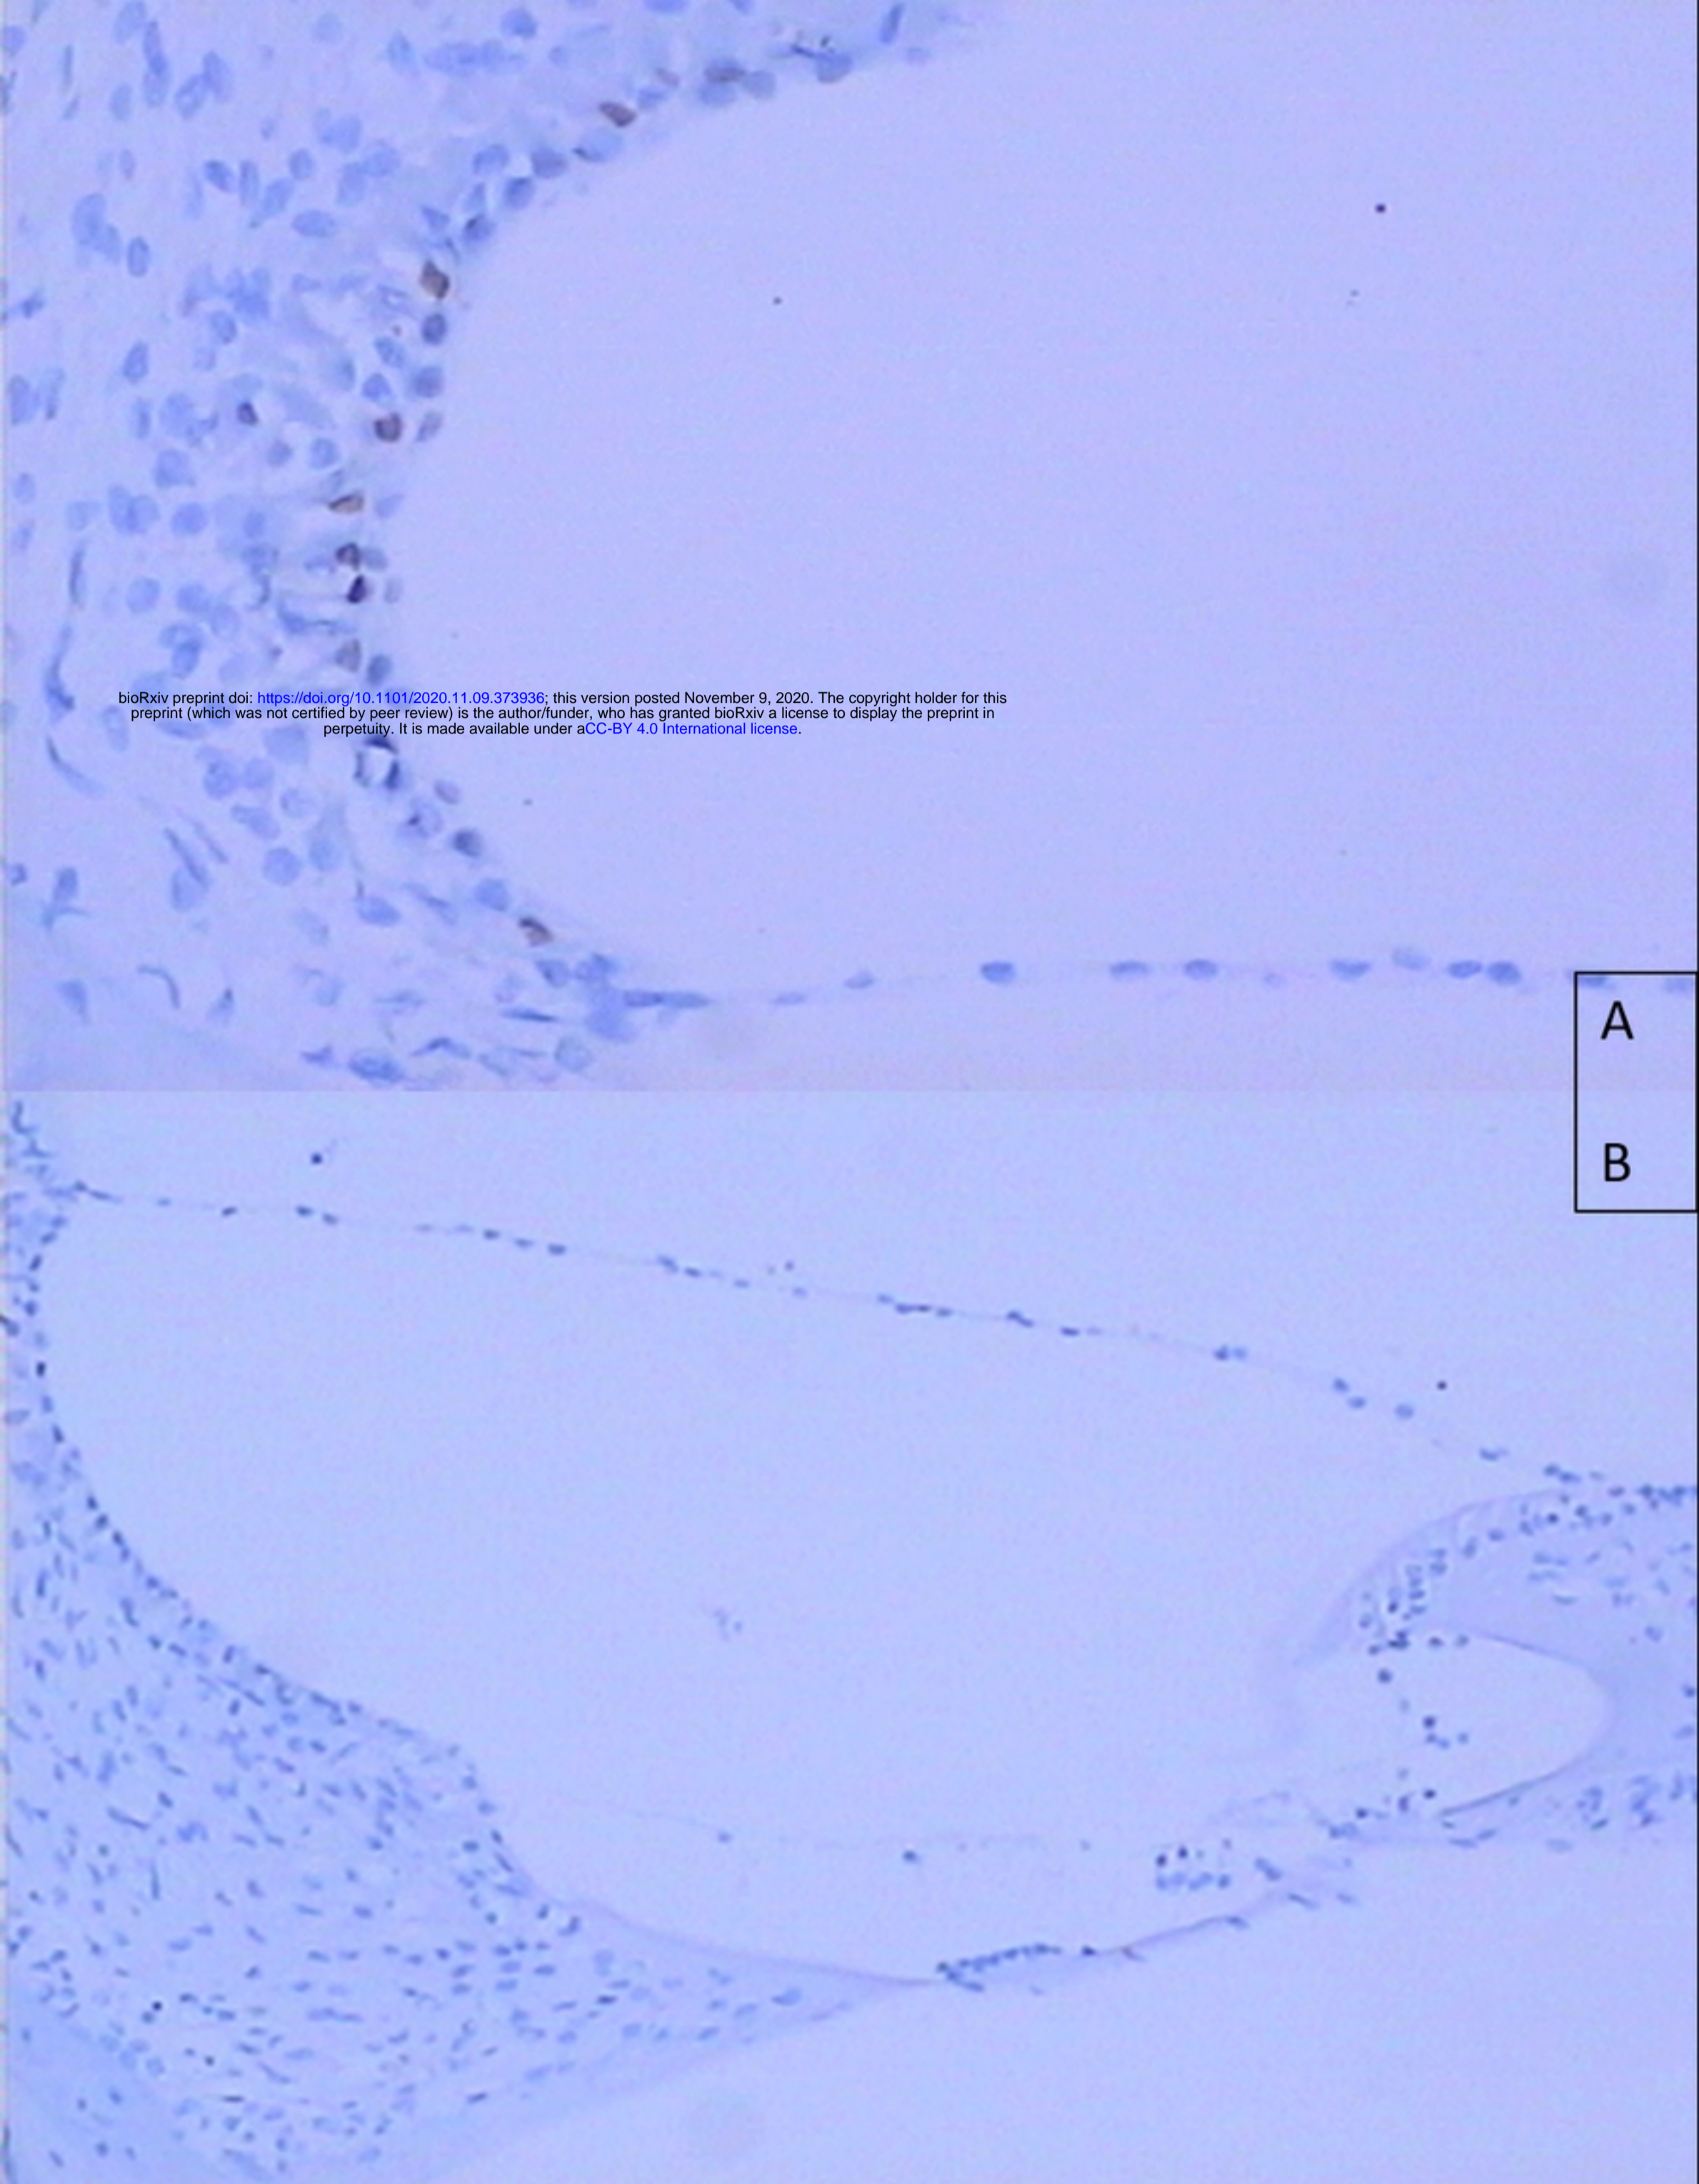

Figure 6

## Hearing threshold + standart deviations

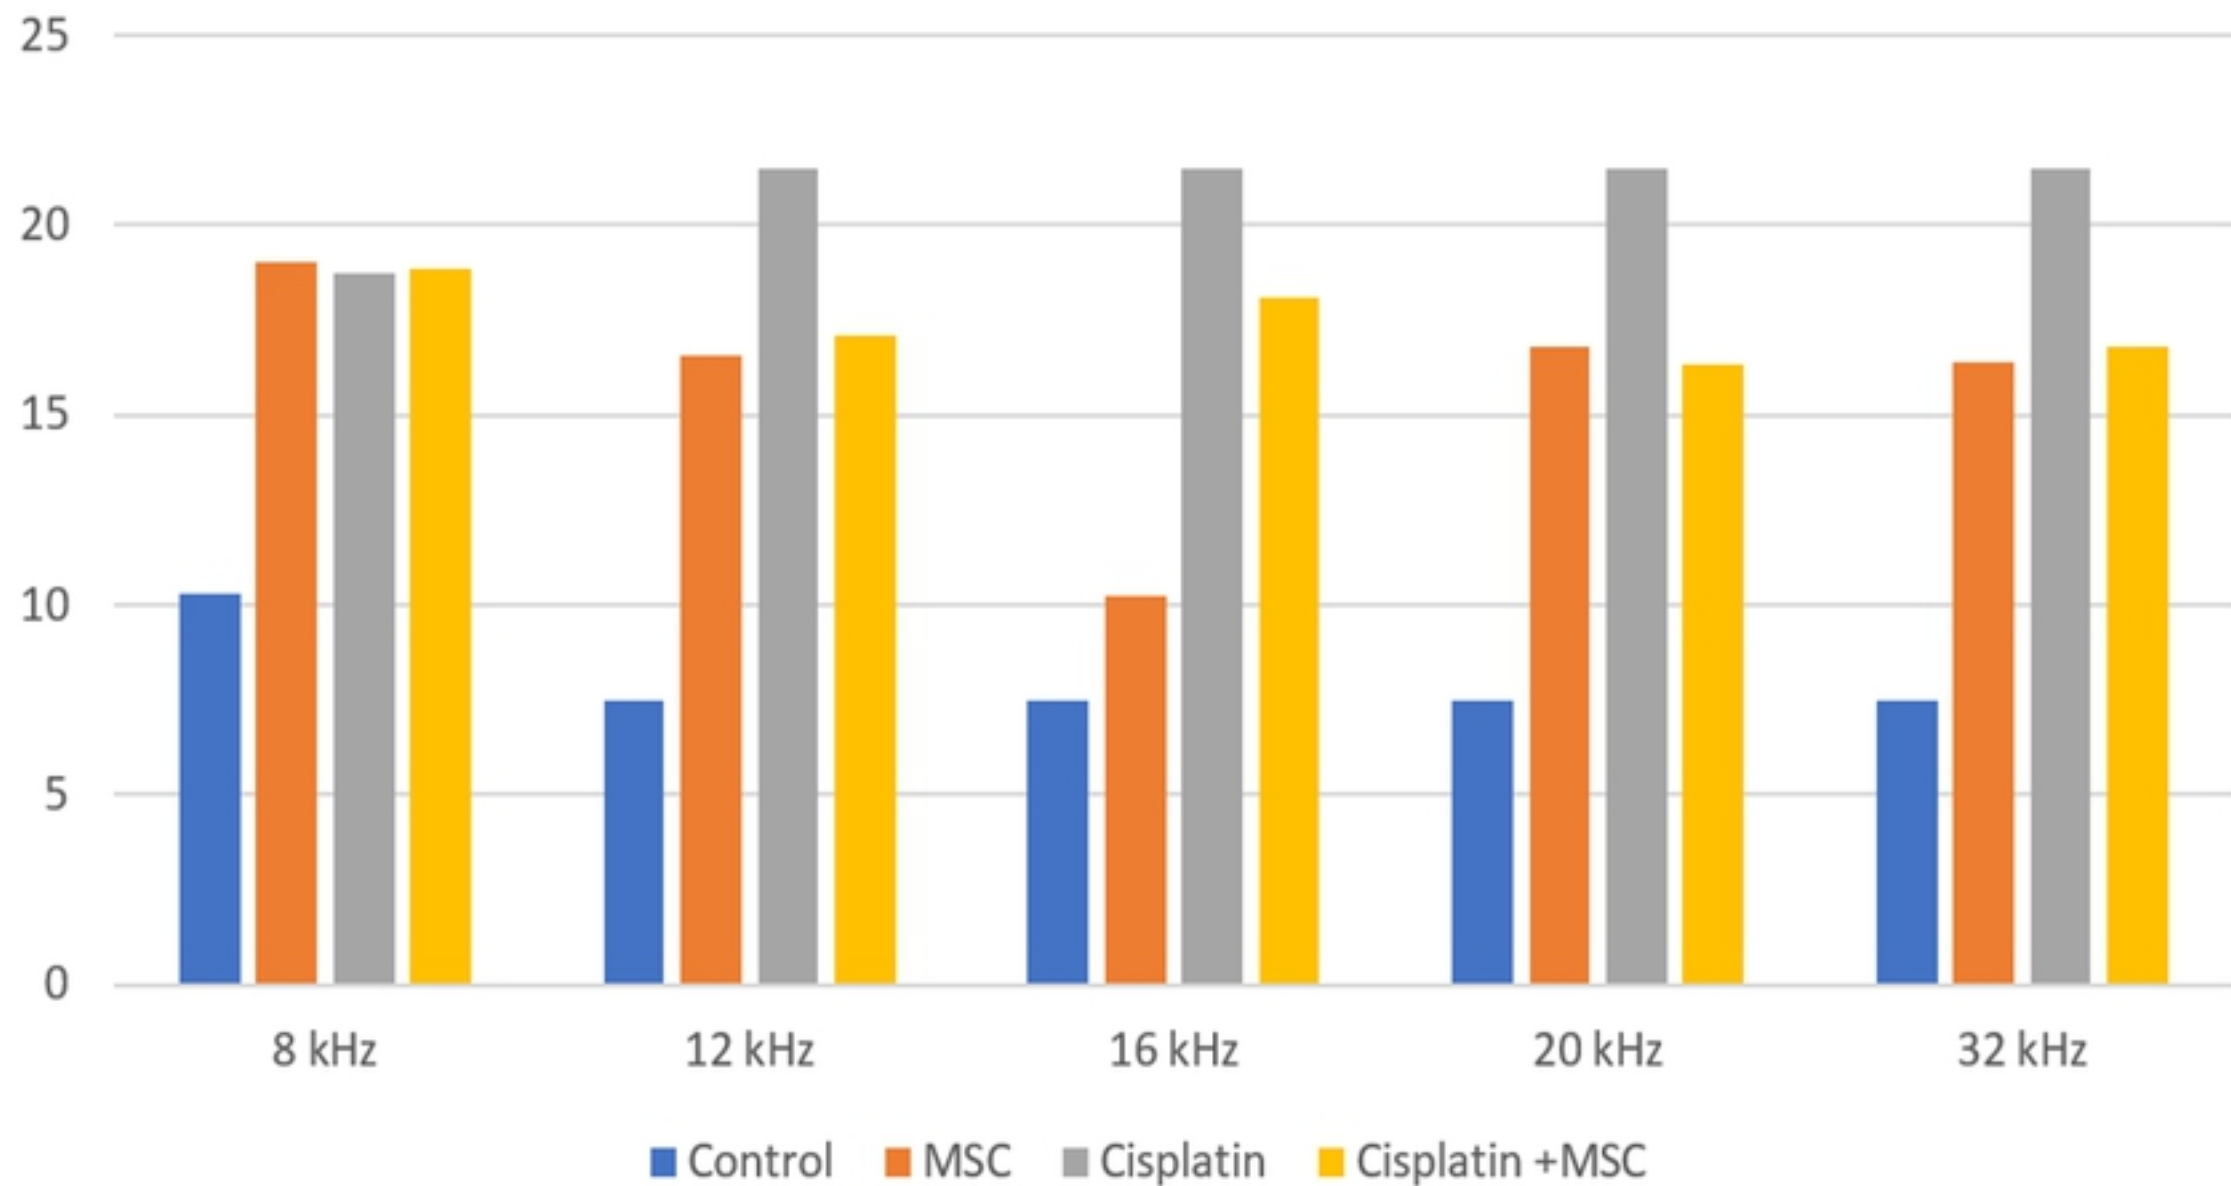

Figure 7
